# Supplementary material for: NIR-emitting aza-BODIPY dyes – new building blocks for broad-range optical pH sensors
Source: Royal Society of Chemistry journal article supplement (doi:10.1039/c5an01389e), 2015-01-01
Supplement: c5an01389e1.pdf [file c5an01389e1.pdf]

## Electronic supporting material

### Absorption and Fluorescence:

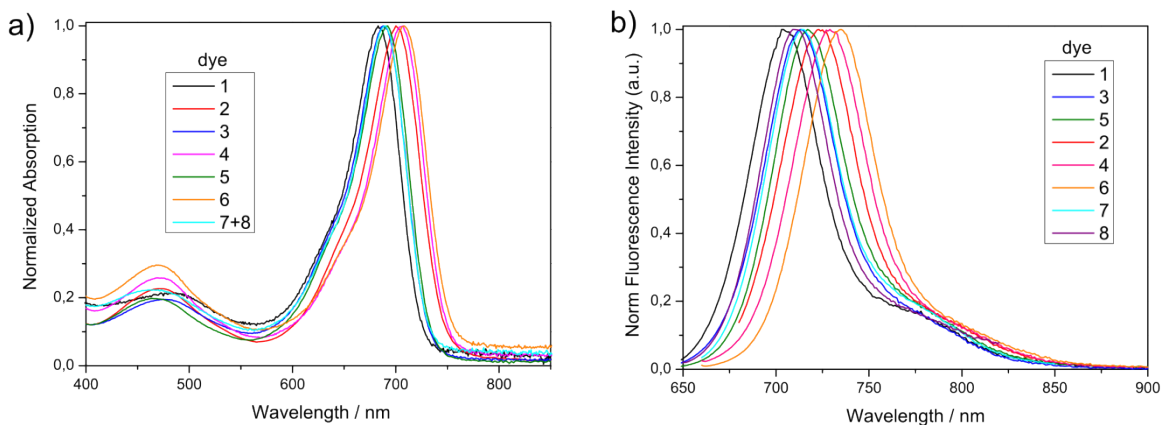

**Figure S1. Normalized absorption (a) and fluorescence (b) of dyes (1-8)**

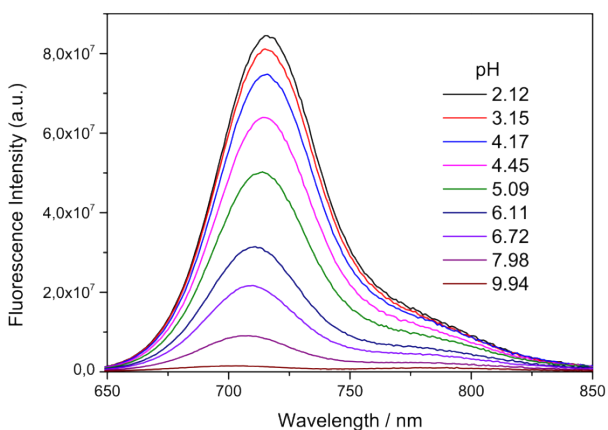

**Figure S2. pH dependence of fluorescence emission of the novel broad-range pH sensor based on the mixture of dyes 1,2,3,5.**

**Table S1. Boltzmann equation**

| Model    | Boltzmann                                |
|----------|------------------------------------------|
| Equation | $y = A2 + (A1-A2)/(1 + \exp((x-x0)/dx))$ |

**Table S2. Parameters of the non-linear curve fit (Boltzmann) of broad-range sensor**

| A1       | A2       | x0      | dx      | R <sup>2</sup> |
|----------|----------|---------|---------|----------------|
| 7,57E+07 | 1,44E+06 | 5,14789 | 0,92544 | 0,99851        |

## Leaching test

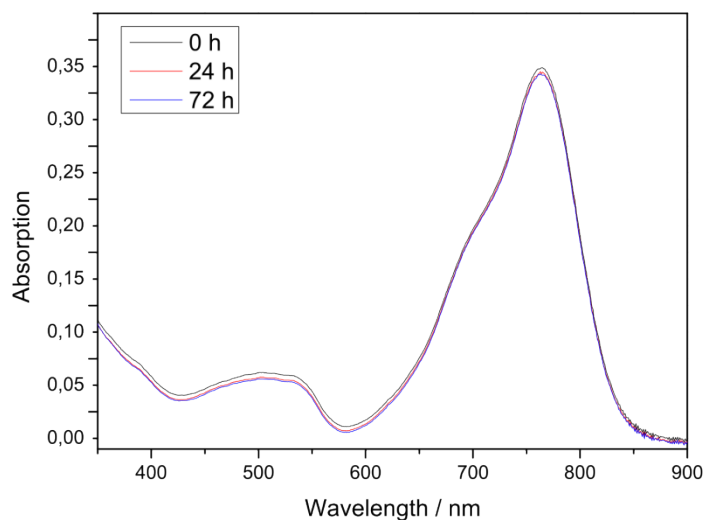

**Figure S3. Absorption spectra of the broad-range sensor ( dye 1,2,3,5) under continuous flushing with aqueous buffer (pH 9.2, IS 150mM). No leaching is observed.**

## Photostability

Photobleaching experiments of the broad-range pH sensor were performed by irradiating the samples with the light of a 642-nm high-power 10W LED array ( $\sim 6300 \mu\text{mol s}^{-1}\text{m}^{-2}$ ). In fact, continuous illumination for over 3 hours caused no changes in the absorption. This corresponds to  $\sim 72\,000\,000$  measurements points if the sensor is read out with a phase fluorometer (Pyroscience oxygen meter) which equals the measurement time of 2.3 years (measurement frequency is set to one point per second).

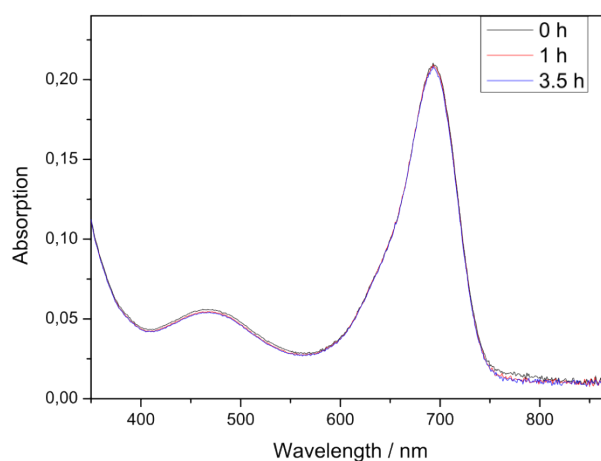

**Figure S4. Absorption spectra of the broad-range sensor under continuous irradiation with a high-power LED.**

### Comparison with Fluorescein derivatives:

Figure S5 shows a broad-range pH sensor based on three lipophilic fluorescein derivatives. However, the  $pK_a$  determining functionalities have significant effect on the photostability of the indicator dyes respectively. Consequently, after irradiating the pH sensor with the light of high power 10 W LED array ( $\lambda_{max}$  458nm,  $\sim 3900 \mu\text{mol s}^{-1}\text{m}^{-2}$ ) for 30 minutes, the calibration curve is considerably altered due to photo-bleaching of the less photo-stable 2,7'-dihexyl-fluorescein-octadodecylamide. This exemplifies that other classes of pH indicator dyes (here fluorescein) are not suitable for the development of a broad-range sensor due to different photo-degradation rates.

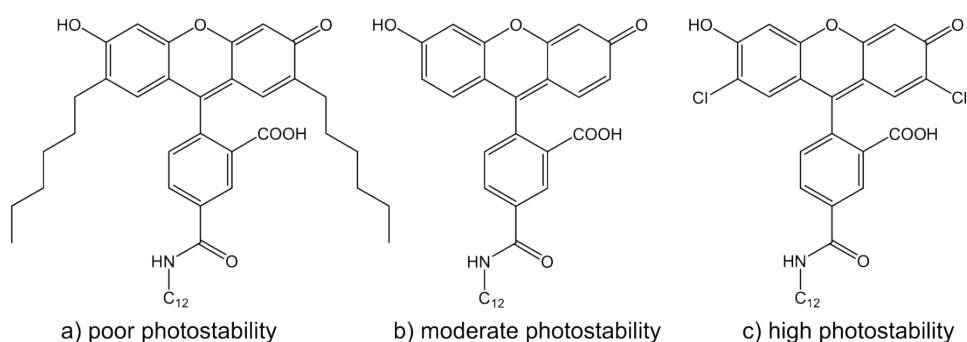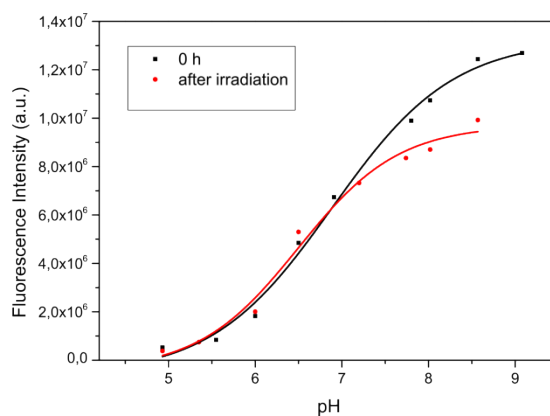

Figure S5 up: Chemical Structures of the used fluorescein derivatives. Below: calibration curve of the sensor before and after irradiation with blue LED.

## Aggregation test

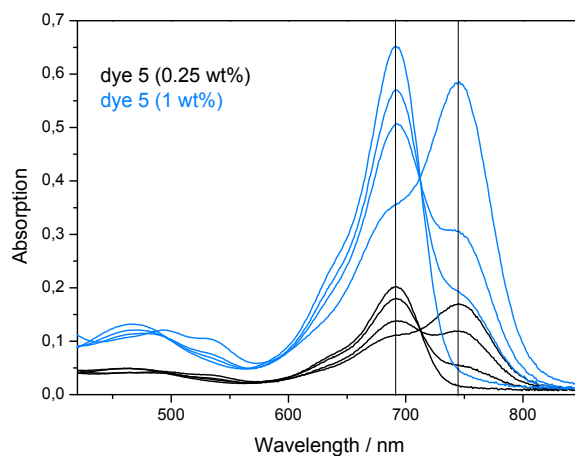

**Figure S6 Absorption spectra of two pH sensors with different concentrations of dye (probe 5, 0.25 wt% and 1wt%, respectively), physically entrapped in hydrogel D4 at different pH. No aggregation is observed.**

The new aza-BODIPY dyes exhibit pronounced hydrophobicity, which may favour aggregation when physically entrapped in hydrophilic host polymer. Thus, pH sensors with different dye concentrations (probe 5, 0.25 wt% and 1wt%, respectively) were prepared and their potential aggregation at different pH was investigated via absorption measurements. No aggregation could be observed, even at high dye concentrations. The form of the absorption peaks is not changed and the absorption maxima of the (de)protonated form (690 nm and 745 nm, respectively) are not batho- or hypsochromically shifted. The isobestic point is observed and remains at 711 nm when increasing the dye concentration from 0.25 to 1wt% in D4. This indicates that the dyes are present in monomeric form in hydrogel D4.

## Materials

4'-butoxyacetophenone, 4'-acetylbenzoic acid, 1-(3-dimethylaminopropyl)-3-ethylcarbodiimide hydrochloride, diisopropylethylamine, benzaldehyde and boron trifluoride diethyl etherate were purchased from TCI Europe (<http://www.tcichemicals.com/en/eu/>). 3',5'-Dichloro-4'-hydroxyacetophenone was obtained from AApin Chemicals. (<http://www.apinchemicals.com/>) and 4'-hydroxychalcone was bought from ABCR (<http://www.abcr.de/startseite/>). 3'-Chloro-4'-hydroxyacetophenone, nitromethane, ammonium acetate, dodecylamine, 1-hydroxybenzotriazole hydrate, MOPS buffer and anhydrous sodium sulfate were purchased from Sigma Aldrich (<http://www.sigmaaldrich.com/austria.html>). Deuterated chloroform (CDCl<sub>3</sub>) and dimethyl sulfoxide (DMSO-d<sub>6</sub>) were obtained from Euriso-top ([www.eurisotop.com](http://www.eurisotop.com)). All other solvents (synthesis grade) as well as sodium chloride and the buffer salts (MES, HEPES, and CHES) were purchased from Carl Roth ([www.roth.de](http://www.roth.de)). Silica-gel (0.04-0.063 mm) was bought from Acros ([www.fishersci.com](http://www.fishersci.com)). Polyurethane hydrogel (Hydromed D4) was purchased from AdvanSource biomaterials ([www.advbimaterials.com](http://www.advbimaterials.com)). Poly-(ethylene glycol terephthalate) support (Mylar) was from Pütz (<http://www.puetz-folien.com/wb/pages/englisch/home.php>).

## Methods

Absorption measurements were performed on a Cary 50 UV-VIS spectrophotometer from Varian, Palo Alto, United States ([www.varianinc.com](http://www.varianinc.com)) at medium scan rate using baseline correction and an adequate blank sample.

Fluorescence spectra of dye solutions were recorded on a Hitachi-F-7000 spectrofluorometer ([www.hitachi.com](http://www.hitachi.com)), equipped with a R980 photomultiplier and corrected for detector response. Fluorescence measurements for the pH sensors were performed on a Fluorolog3 spectrofluorimeter (Horiba J. Y., [www.horiba.com](http://www.horiba.com)) equipped with a NIR-sensitive photomultiplier R2658 from Hamamatsu (300-1050 nm). Relative fluorescence quantum yields were determined by using tetra-*tert*-butyl-29*H*,31*H*-phthalocyanine as a standard ( $\phi = 0.44$ , Fluka, [www.sigmaaldrich.com](http://www.sigmaaldrich.com)) according to Demas and Crosby<sup>[1]</sup>.

The pH of the buffer solution (acetate, MES, HEPES, CHES) was adjusted with a pH meter using a glass electrode (InoLab pH/ion, WTW GmbH & Co. KG, [www.wtw.com](http://www.wtw.com)). The pH meter was calibrated at 25°C with standard buffers of pH 7.01 and pH 4.01 (WTW GmbH & Co. KG, [www.wtw.com](http://www.wtw.com)). Ionic strength (IS = 150mM) of the buffers was adjusted by using sodium chloride as the background electrolyte.

The NMR spectroscopic experiments were performed on a 300 MHz instrument (Bruker) in DMSO-d<sub>6</sub> or CDCl<sub>3</sub> with TMS (tetramethylsilane) as a standard. Chemical shifts ( $\delta$ ) are given in parts per million (ppm) relative to TMS and coupling constants *J* are stated in Hz.

### *Preparation of optical sensor*

A “cocktail” containing an indicator (0.25 mg), hydrogel D4 (100 mg) in 700  $\mu\text{l}$  EtOH/H<sub>2</sub>O (9:1 v/v), and tetrahydrofuran (300  $\mu\text{l}$ ) was knife-coated on a dust-free PET support to obtain a 2.5  $\mu\text{m}$  thick sensing layer after solvent evaporation.

The “cocktail” for the broad-range pH sensor was prepared similarly from a mixture of indicator **1**, **2**, **3**, **4** (0.05 mg respectively, total  $\Sigma$  0.20 % w/w), hydrogel D4 (100mg) and dissolved in 700  $\mu\text{l}$  EtOH/H<sub>2</sub>O (9:1 v/v) and tetrahydrofuran (300  $\mu\text{l}$ ). Subsequently it was knife-coated in the same way as mentioned above.

### **Experimental Section**

1-(3-chloro-4-hydroxyphenyl)-4-nitro-3-phenylbutan-1-one and 1-(4-hydroxyphenyl)-4-nitro-3-phenylbutan-1-one were synthesized according to Jokic et al.<sup>[2]</sup> 1-(4-butoxyphenyl)-4-nitro-3-phenylbutan-1-one was prepared according to literature procedure<sup>[3]</sup> The synthesis of the new aza-BODIPYs were performed in a routine step route, starting from diaryl  $\alpha,\beta$ -unsaturated ketones (chalcones) which were prepared by Claisen-Schmidt condensation from the corresponding acetophenone and benzaldehyde. Michael-addition of nitromethane to these chalcones provide the 1,3-diaryl-4-nitrobutan-1-ones. Condensation with ammonium acetate at elevated temperature gave a mixture of azadipyrrromethene dyes which were separated via chromatography. Carboxy-functionalized compounds (**1**, **3**, **5**) were modified with dodecylamine by using EDC (1-Ethyl-3-(3-dimethylaminopropyl)carbodiimide) as carboxyl activating agent in order to yield an amide bond. Attachment of dodecylamine was performed prior to complexation reaction which avoids solubility problems. Finally, complexation reaction with boron trifluoride gave the new aza-BODIPYs in moderate yield.

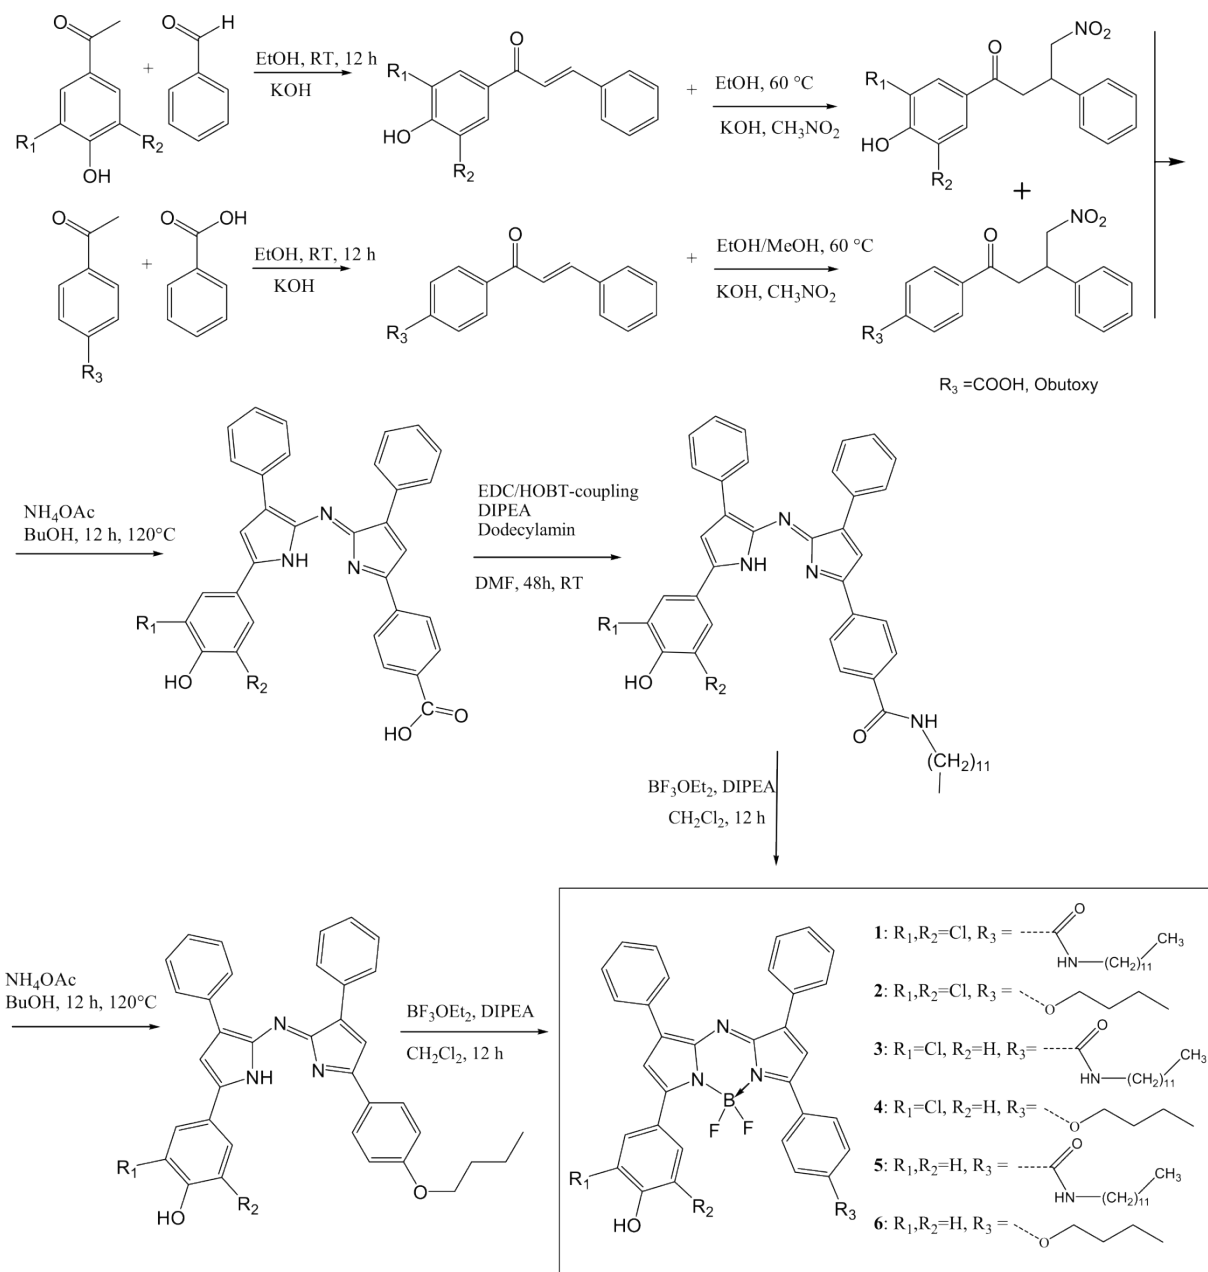

Figure S 7 Synthetic pathway of dye 1-6

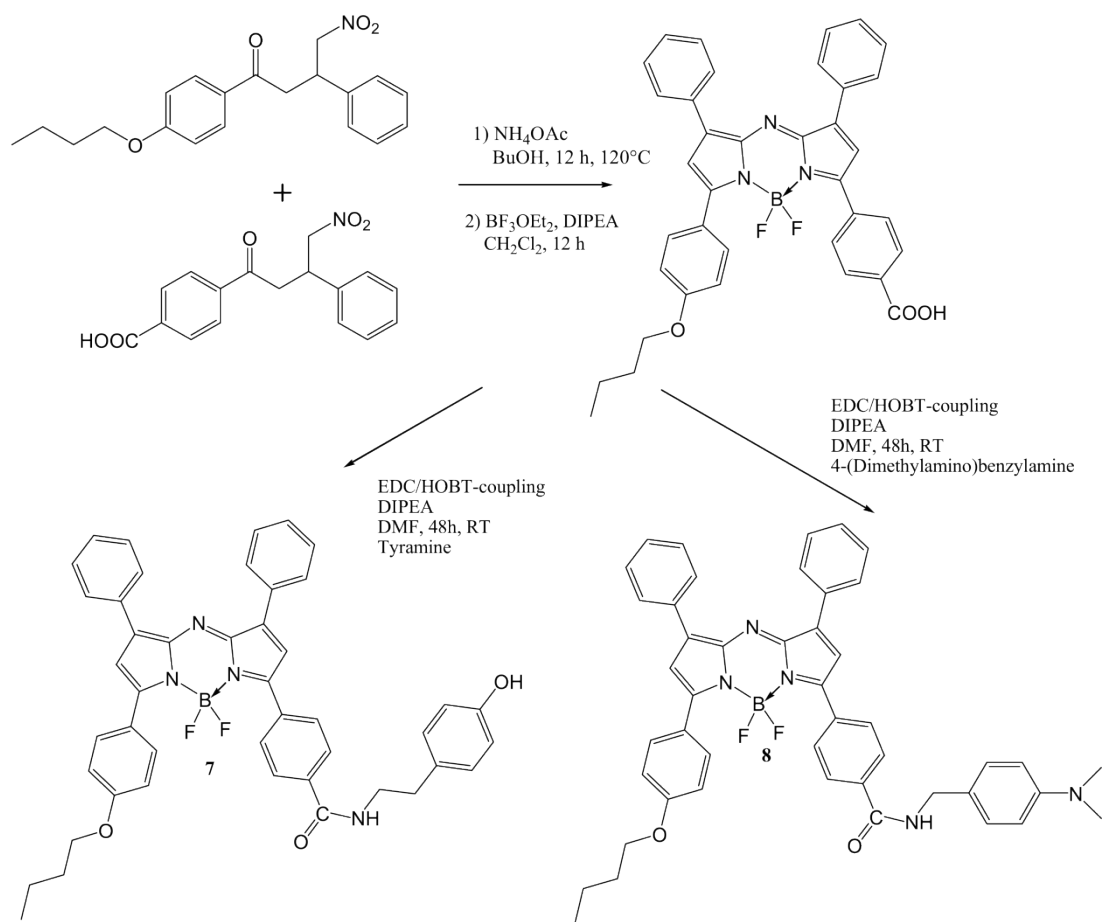

Figure S 8 Synthetic pathway of dye 7 and 8



## Synthesis of compound 1

*4-(7-(3,5-dichloro-4-hydroxyphenyl)-5,5-difluoro-1,9-diphenyl-5H-5λ<sup>4</sup>,6λ<sup>4</sup>-dipyrrolo[1,2-c:2',1'-f][1,3,5,2]triazaborinin-3-yl)-N-dodecylbenzamide (1)*

*1-(3,5-dichloro-4-hydroxyphenyl)-3-phenylprop-2-en-1-one*

3, 5 Dichloro-4-hydroxyacetophenone (1 eq, 2.01 g, 9.8 mmol), benzaldehyde (1 eq, 997 μl, 9.8 mmol) and potassium hydroxide (3 eq, 1.65 g, 29.4 mmol in 8 ml H<sub>2</sub>O) were dissolved in ethanol (20ml) and stirred at room temperature for 12 hours. During the course of the reaction the product partly precipitates from the reaction mixture. Then, the reaction solution was acidified with hydrochloric acid (1M) and the resulting light yellow precipitate was isolated by filtration and washed with water. The precipitate was dried under reduced pressure and was used for the next step without further purification (2.85 g).

*1-(3,5-dichloro-4-hydroxyphenyl)-4-nitro-3-phenylbutan-1-one (1a)*

After 1-(3-chloro-4-hydroxyphenyl)-3-phenylpropenone (1 eq, 3.10 g, 120 mmol) was dissolved in ethanol/methanol (5:1 v/v, 60 ml), nitromethane (20 eq, 1.96 ml, 239 mmol) and potassium hydroxide (1.3 eq, 0.87 g, 15.6 mmol) were added and the reaction was heated at 65 °C for three hours. After cooling, the solvent was removed in vacuum and the resulting oily residue was acidified with hydrochloric acid (0.1 M) and was partitioned between ethyl acetate and water in a separating funnel. The organic layer was separated, dried over sodium sulfate and the solvent evaporated under reduced pressure. The obtained product was used for the next step without purification (3.37g, 88.0 %)

*4-((E)-3-phenylacryloyl) benzoic acid*

A solution of 4- acetylbenzoic acid (1 eq, 2.50 g, 15 mmol) and benzaldehyde (1 eq, 1.55 ml, 15 mmol) and potassium hydroxide (3 eq, 2.56 g, 47 mmol in 8 ml H<sub>2</sub>O) in ethanol (100ml) was stirred at room temperature for 12 hours. During the course of the reaction the product partly precipitated from the reaction mixture. Then, the reaction solution was acidified with hydrochloric acid (1M) and the solid was collected on a filter and washed with distilled water to afford the title compound in quantitative yields (3.8 g).

*4-(4-nitro-3-phenylbutanoyl) benzoic acid (1b)*

4-((E)-3-phenylacryloyl) benzoic acid (1 eq, 3.80 g, 15.1 mmol) was dissolved in methanol (175 ml) nitromethane (20 eq, 16 ml, 301 mmol) and potassium hydroxide (1.3 eq, 1.10 g, 19.6 mmol) were added and the reaction was heated under reflux for 6 hours. After cooling to room temperature, the solvent was removed in vacuum. The resulting oily residue was acidified with 0.1 N HCl and was partitioned between ethyl acetate and distilled water in a

separating funnel. The organic layer was separated, dried over sodium sulfate and evaporated under reduced pressure. (3.27 g, 67.6 %)

*(Z)-4-(5-((5-(3,5-dichloro-4-hydroxyphenyl)-3-phenyl-2H-pyrrol-2-ylidene)amino)-4-phenyl-1H-pyrrol-2-yl)benzoic acid (1c)*

Compound **1a** (1 eq, 1.55 g, 4.4 mmol) and compound **1b** (1 eq, 1.37 g, 4.4 mmol) and ammonium acetate (35 eq, 17.10 g, 222 mmol) were dissolved in butanol (35 ml) and heated under reflux for 12 hours while stirring. After cooling, the solvent was removed under reduced pressure. The obtained solid was washed with water three times and the crude product was purified by column chromatography on silica-gel eluting with a MeOH/CH<sub>2</sub>Cl<sub>2</sub> mixture. After eluting the symmetrical by-product with 2% MeOH/CH<sub>2</sub>Cl<sub>2</sub> the final product was obtained by gradually increasing the polarity to 12-18% MeOH/CH<sub>2</sub>Cl<sub>2</sub> and the solvent evaporated under vacuum. The final product was recrystallised from hexane/tetrahydrofuran mixture (1:1) and dried in an oven at 60 °C. (231 mg, 8 %) For the calculation, the theoretical yield of the asymmetrical product is set as 100%.

*(Z)-4-(5-((5-(3,5-dichloro-4-hydroxyphenyl)-3-phenyl-2H-pyrrol-2-ylidene)amino)-4-phenyl-1H-pyrrol-2-yl)-N-dodecylbenzamide (1d)*

A solution of **1c** (1 eq, 231 mg, 0.4 mmol), 1-hydroxybenzotriazole hydrate (1.2 eq, 64.8 mg, 0.48 mmol), 1-(3-dimethylaminopropyl)3-ethylcarbodiimide hydrochloride (EDC, 1.2 eq, 91.8 mg, 0.48 mmol) dodecylamine (1 eq, 74.0 mg, 0.4 mmol) and diisopropylethylamine (DIPEA, 5 eq, 333 µl, 2 mmol) in DMF was stirred at room temperature for 48 hours. Then the product was precipitated by adding saturated NaCl solution and collected by centrifugation. The crude solid was purified by column chromatography on silica gel, eluting with 2.5 % EtOH/CH<sub>2</sub>Cl<sub>2</sub>. The fractions were united and the solvent was removed under reduced pressure and the resulting blue solid was recrystallized from hexane/tetrahydrofuran. (32 mg, **19.8 %**)

*4-(7-(3,5-dichloro-4-hydroxyphenyl)-5,5-difluoro-1,9-diphenyl-5H-5λ<sup>4</sup>,6λ<sup>4</sup>-dipyrrolo[1,2-c:2',1'-f][1,3,5,2]triazaborinin-3-yl)-N-dodecylbenzamide (1)*

**1d** (1 eq, 25 mg, 0.035 mmol) was dissolved in dry CH<sub>2</sub>Cl<sub>2</sub> (20 ml) N,N-diisopropylethylamine (DIPEA, 10 eq, 0.35 mmol, 61 µl) and boron trifluoride diethyl etherate (15 eq, 0.53 mmol, 65 µl) were added under inert atmosphere (N<sub>2</sub>) and the solution was stirred at room temperature for 12 hours. The green-blue solution was shaken with water and dichloromethane three times and dried over sodium sulfate. The product was purified by column chromatography on silica gel using 2-4 % EtOH/ CH<sub>2</sub>Cl<sub>2</sub> as eluent. The fractions containing the product were united and the solvent was removed under reduced pressure. Further purification was achieved by crystallization from hexane/tetrahydrofuran to give the final product as a blue powder. (15 mg, 55.6 %)

<sup>1</sup>H- NMR (300 MHz, CDCl<sub>3</sub>) δ: 8.12-8.04 (m, 8H); 7.94-7.85 (m, 2H); 7.47-7.34 (m, 6H); 7.07 (s, 1H); 6.98 (s, 1H); 6.2 (t, *J* = 5.3 Hz, 1H) 3.47 (t, *J* = 6.8 Hz, 2H); 1.67-1.58 (m, 3H); 1.36-1.27 (m, 18H); 0.88 (t, *J* = 5.8 Hz, 3H)

MALDI-TOF *m/z* found 792.2934 calculated 792.2988.

## Synthesis of compound 2

*(Z)*-4-(2-((5-(4-butoxyphenyl)-3-phenyl-1H-pyrrol-2-yl)imino)-3-phenyl-2H-pyrrol-5-yl)-2,6-dichlorophenol (**2a**)

Compound **1a** (1 eq, 1.16 g, 3.3 mmol) and 1-(4-butoxyphenyl)-4-nitro-3-phenylbutan-1-one (1 eq, 1.12 g, 3.3 mmol) were dissolved in butanol (30 ml). Ammonium acetate (35 eq, 17.10 g, 115 mmol) was added and the reaction solution was heated at 120 °C under reflux for 12 hours. After cooling to room temperature, the solvent was removed under reduced pressure. Afterwards the solid was redissolved in CH<sub>2</sub>Cl<sub>2</sub> and washed with water three times. Then, the solid was purified by column chromatography on silica gel. After eluting the first symmetrical by-product with cyclohexane/dichloromethane (1:1 v/v), the product was eluted with dichloromethane and the solvent was removed under reduced pressure. Further purification was achieved by crystallization from hexane/tetrahydrofuran to give the dye as blue powder. For the calculation, the theoretical yield of the asymmetrical product is set as 100 %. (526 mg, 26.6 %)

4-(7-(4-butoxyphenyl)-5,5-difluoro-1,9-diphenyl-5H-4λ<sup>4</sup>,5λ<sup>4</sup>-dipyrrolo[1,2-*c*:2',1'-*f*][1,3,5,2]triazaborinin-3-yl)-2,6-dichlorophenol (**2**)

Compound **2a** (1 eq, 526 mg, 0.87 mmol) was dissolved in CH<sub>2</sub>Cl<sub>2</sub> (25 ml). *N,N*-diisopropylethylamine (DIPEA, 10 eq, 8.7 mmol, 1.51 ml) and boron trifluoride diethyl etherate (15 eq, 13.0 mmol, 1.59 ml) were added under N<sub>2</sub>-atmosphere and the reaction solution was stirred at room temperature over night. Then, the green solution was washed with water three times. The product was purified by column chromatography (silica gel in cyclohexane). The product was obtained by gradually increasing the polarity of cyclohexane/CH<sub>2</sub>Cl<sub>2</sub> (1:1.5 -1:3 v/v). Further purification was achieved by crystallization from hexane/tetrahydrofuran to give the final product as a red-metallic solid. (162 mg, 30.8 %)

<sup>1</sup>H NMR (300 MHz, CDCl<sub>3</sub>) δ: 8.15 (d *J* = 9.0 Hz, 2H); 8.06 (m, *J* = 8.6 Hz; 4H); 8.03 (s, 2H); 7.46 (t, *J* = 7.4 Hz, 6H); 7.16 (s, 1H); 7.03 (d, 2H); 6.90 (s, 1H); 4.12 (t, *J* = 7.86 Hz, 2H); 1.75 (q, 2H); 1.47 (q, 2H); 0.96 (t, *J* = 7.3 Hz, 3H)

MALDI-TOF *m/z* found 653.1664 calculated 653.1626

### Synthesis of compound 3

*(Z)*-4-(5-((5-(3-chloro-4-hydroxyphenyl)-3-phenyl-2H-pyrrol-2-ylidene)amino)-4-phenyl-1H-pyrrol-2-yl)benzoic acid (**3a**)

1-(3-chloro-4-hydroxyphenyl)-4-nitro-3-phenylbutan-1-one (1 eq, 2.03 g, 6.3mmol) was dissolved in butanol (100 ml). Compound **1b** (1 eq, 1.99 g, 6.3 mmol) and ammonium acetate (35 eq, 17.10 g, 222 mmol) were added and the reaction solution was heated at 120 °C for 12 hours. After cooling to room temperature the solvent was removed under reduced pressure. Afterwards the solid was washed with water three times. The crude solid was purified by column chromatography on silica gel using CH<sub>2</sub>Cl<sub>2</sub>. After eluting impurities and symmetrical by-product with 5% MeOH/CH<sub>2</sub>Cl<sub>2</sub>, the final product was obtained by increasing the polarity of the eluent (10-12% MeOH/CH<sub>2</sub>Cl<sub>2</sub>). Afterwards the blue-black solid was recrystallized from hexane/tetrahydrofuran mixture. For the calculation, the theoretical yield of the asymmetrical product is set as 100 %. (359 mg, **10.4 %**)

*(Z)*-4-(5-((5-(3-chloro-4-hydroxyphenyl)-3-phenyl-2H-pyrrol-2-ylidene)amino)-4-phenyl-1H-pyrrol-2-yl)-*N*-dodecylbenzamide (**3b**)

**3a** (1 eq, 122 mg, 0.224 mmol) was dissolved in DMF (20 ml). *N*-hydroxysuccinimide (1.01 eq, 26.1 mg, 0.227 mmol), dodecylamine (1.01 eq, 42.0 mg, 0.227 mmol) and 1-(3-dimethylaminopropyl)3-ethylcarbodiimide hydrochloride EDC (1.01 eq, 43.5 mg, 0.227 mmol) were added and the reaction solution was stirred at room temperature for 48 hours. Then, the dye was precipitated by adding saturated NaCl-solution and separated by centrifugation. The crude product was purified by column chromatography on silica gel, eluting with 2.5 % EtOH/CH<sub>2</sub>Cl<sub>2</sub>. Further purification was achieved by crystallization from hexane-THF mixture. (32 mg, **19.8 %**)

4-(7-(3-chloro-4-hydroxyphenyl)-5,5-difluoro-1,9-diphenyl-5H-5λ<sup>4</sup>,6λ<sup>4</sup>-dipyrrolo[1,2-c:2',1'-f][1,3,5,2]triazaborinin-3-yl)-*N*-dodecylbenzamide (**3**)

**3b** (1 eq, 25 mg, 0.035 mmol) was dissolved in dry CH<sub>2</sub>Cl<sub>2</sub> (20 ml) *N,N*-diisopropylethylamine (DIPEA, 10 eq, 0.35 mmol, 61 μL) was added and the solvent was stirred at room temperature. Boron trifluoride diethyl etherate (15 eq, 0.53 mmol, 65 μL) was added under N<sub>2</sub>-atmosphere and the reaction solution was stirred overnight. The green-blue solution was partitioned with water and dichloromethane three times and dried over sodium sulfate. The crude solid was purified by column chromatography on silica gel in CH<sub>2</sub>Cl<sub>2</sub>. The product was obtained by gradually increasing the polarity to 2-4 % EtOH/ CH<sub>2</sub>Cl<sub>2</sub>. The fractions containing the product were united and the solvent was removed under reduced pressure. Further purification was achieved by crystallization from hexane/tetrahydrofuran to give the final product as a blue powder. (15 mg, **55.6 %**)

<sup>1</sup>H-NMR (300 MHz, CDCl<sub>3</sub>) δ: 8.10-7.94 (m, 7H); 7.86-7.83 (d, *J* = 8.4 Hz, 2H); 7.45-7.43 (m, 6H); 7.14-7.11 (s, 1H); 7.03 (d, *J* = 7.4 Hz, 2H); 6.24 (t, *J* = 5.5 Hz, 1H) 3.46 (m, 2H); 1.64-1.60 (m, 4H); 1.34-1.26 (m, 18H); 0.88 (t, *J* = 6.4 Hz, 3H)

MALDI-TOF: *m/z* found 758.3310, calculated 758.3378.

#### Synthesis compound 4

*(Z)*-4-(2-((5-(4-butoxyphenyl)-3-phenyl-1H-pyrrol-2-yl)imino)-3-phenyl-2H-pyrrol-5-yl)-2-chlorophenol (**4a**)

1-(3-chloro-4-hydroxyphenyl)-4-nitro-3-phenylbutan-1-one (1 eq, 2.93 g, 9.16 mmol) and 4-butoxyphenyl)-4-nitro-3-phenylbutan-1-one (1 eq, 2.55 g, 7.46 mmol) were dissolved in 100 ml 2-propanol and ammonium acetate (35 eq, 20.12 g, 261 mmol) was added. Then the solution was heated at 110 °C and stirred over night. The next day, the solvent was removed under reduced pressure and the residue was redissolved in CH<sub>2</sub>Cl<sub>2</sub> and washed with water three times. The crude solid was purified by column chromatography on silica gel, eluting with CH<sub>2</sub>Cl<sub>2</sub>/n-hexane (1:1 v/v). Further purification was achieved by crystallization from hexane/tetrahydrofuran to give the final product as a red-metallic solid. (1.49 g, **35 %**).

<sup>1</sup>H-NMR (300 MHz, DMSO-*d*<sub>6</sub>) : 8.07 (d, *J* = 6.7 Hz, 5H); 7.98 (d, *J* = 8.6 Hz, 2H); 7.89 - 7.82 (m, 1 H); 7.58 (s, 1 H); 7.53 (s, 1H); 7.42 (dt, *J* = 15.3 Hz, 7.0 Hz, 6H); 7.18 (d, *J* = 8.5 Hz, 1H); 7.14 - 7.06 (m, 2H); 4.09 (t, *J* = 6.4 Hz, 2H); 1.75 (p, *J* = 6.5 Hz, 2H); 1.48 (h, *J* = 7.2 Hz, 2H); 0.97 (t, *J* = 7.3 Hz, 3H)

4-(7-(4-butoxyphenyl)-5,5-difluoro-1,9-diphenyl-5H-4λ<sup>4</sup>,5λ<sup>4</sup>-dipyrrolo[1,2-*c*:2',1'-*f*][1,3,5,2]triazaborinin-3-yl)-2-chlorophenol (**4**)

Compound **4a** (1.41 g, 2.47 mmol) was dissolved in anhydrous CH<sub>2</sub>Cl<sub>2</sub> under inert atmosphere (N<sub>2</sub>). Afterwards *N,N*-diisopropylethylamine (DIPEA, 10 eq, 4.2 ml, 24.7 mmol) and BF<sub>3</sub> diethyl etherate (15 eq, 4.57 ml, 37.0 mmol) were added and the solution was stirred over night at room temperature. Then, the green solution was washed with water three times. The product was purified by column chromatography (silica gel in cyclohexane). The product was obtained by eluting with cyclohexane/CH<sub>2</sub>Cl<sub>2</sub> (1:1 v/v). Further purification was achieved by crystallization from hexane/tetrahydrofuran to give the final product as a red-metallic solid. 370 mg (**25 %**).

<sup>1</sup>H NMR (300 MHz, DMSO-*d*<sub>6</sub>) δ: 8.23-8.15 (m, 7H); 8.04-8.01 (m, 1H); 7.64-7.45 (m, 9H); 7.16-7.1 (m, 3H); 4.12 (t, *J* = 6.4 Hz, 2H); 1.83-1.66 (m, 2H); 1.57-1.38 (m, 2H); 0.96 (t, *J* = 7.4 Hz, 3H)

MALDI-TOF *m/z* found 619.157 calculated 619.201

### Synthesis of compound 5

*(Z)*-4-(5-((5-(4-hydroxyphenyl)-3-phenyl-2H-pyrrol-2-ylidene)amino)-4-phenyl-1H-pyrrol-2-yl)benzoic acid (**5a**)

1-(4-hydroxyphenyl)-4-nitro-3-phenylbutan-1-one (1 eq, 2 g, 7 mmol), compound **1b** (1 eq, 2.19 g, 7 mmol) and ammonium acetate (35 eq, 15.22 g, 245 mmol) were dissolved in butanol (100 ml) and the solution was heated under reflux at a temperature of 120 °C for 12 h while stirring. After the reaction was cooled down to room temperature the solvent was removed in vacuum. The obtained solid was washed with water three times. Then the raw product was purified by column chromatography by gradually increasing the polarity to 10-18% THF/CH<sub>2</sub>Cl<sub>2</sub>. The final product was recrystallized from hexane/tetrahydrofuran mixture and dried in the oven at 60 °C. For the calculation, the theoretical yield of the asymmetrical product is set as 100%. (300 mg, **12 %**)

<sup>1</sup>H NMR (300 MHz, DMSO-*d*<sub>6</sub>) δ: 8.19-8.06 (m, 8H); 7.99-7.96 (d, *J* = 8.3 Hz, 2H); 7.87 (s, 1H), 7.51-7.33 (m, 7H); 7.08-7.05 (d, *J* = 8.6 Hz, 2H)

Electron impact direct insertion time-of-flight (EI-DI-TOF) *m/z* [MH<sup>+</sup>] found 510.184, calc 510.1818.

*(Z)*-*N*-dodecyl-4-(5-((5-(4-hydroxyphenyl)-3-phenyl-2H-pyrrol-2-ylidene)amino)-4-phenyl-1H-pyrrol-2-yl)benzamide (**5b**)

**5a** (1 eq, 150 mg, 0.295 mmol) was dissolved in DMF (20 ml). *N*-hydroxysuccinimide (1.01 eq, 34 mg, 0.297 mmol), dodecylamine (1.01 eq, 55 mg, 0.297 mmol) and EDC (1.01 eq, 57 mg, 0.297 mmol) were added and the reaction solution was stirred at room temperature for 48 hours. Then, the dye was precipitated by adding saturated NaCl solution and separated by centrifugation. The crude product was purified by column chromatography on silica gel, eluting with 2.5 % EtOH/CH<sub>2</sub>Cl<sub>2</sub>. Further purification was achieved by crystallization from hexane-THF mixture. (50 mg, **25 %**)

<sup>1</sup>H NMR (300 MHz, DMSO-*d*<sub>6</sub>) δ: 8.57 (t, *J* = 6.0 Hz, 1H); 8.18-7.96 (m, 12H); 7.85 (s, 1H); 7.53-7.33 (m, 7H); 7.05 (d, *J* = 8.6 Hz, 3H); 1.56 (m, 2H); 1.36-1.22 (m, 20 H); 0.84 (m, 3H)

4-(5,5-difluoro-7-(4-hydroxyphenyl)-1,9-diphenyl-5H-5λ<sup>4</sup>,6λ<sup>4</sup>-dipyrrolo[1,2-*c*:2',1'-*f*][1,3,5,2]triazaborinin-3-yl)-*N*-dodecylbenzamide (**5**)

**5b** (1 eq, 50 mg, 0.074 mmol) was dissolved in dry CH<sub>2</sub>Cl<sub>2</sub> (20 ml) N,N-diisopropyletamine (DIPEA, 10 eq, 0.74 mmol 122 μl) was added and stirred at room temperature. Afterwards boron trifluoride diethyl etherate (15 eq, 1.11 mmol, 139 μl) was added under N<sub>2</sub>-atmosphere and the reaction solution was stirred overnight. The green-blue solution was partitioned with water and dichloromethane three times and dried over sodium sulfate. The crude solid was purified by column chromatography on silica gel in CH<sub>2</sub>Cl<sub>2</sub>. The product was obtained by gradually increasing the polarity from 2-4 % EtOH/ CH<sub>2</sub>Cl<sub>2</sub>. The fractions containing the product were united and the solvent was removed under reduced pressure. Further purification was achieved by crystallization from hexane/tetrahydrofuran to give the final product as a blue powder. (29.7 mg, **55.6 %**)

<sup>1</sup>H NMR (300 MHz, DMSO-*d*6) δ: 8.6-6.5 (m, 20H); 1.6-0.8 (m, 25H)

MALDI-TOF *m/z* found 724.368 calculated 724.376

Synthesis of compound 6

*(Z)*-4-(2-((5-(4-butoxyphenyl)-3-phenyl-1H-pyrrol-2-yl)imino)-3-phenyl-2H-pyrrol-5-yl)phenol  
**(6a)**

1-(4-hydroxyphenyl)-4-nitro-3-phenylbutan-1-one (1 eq, 1.75 g, 6.15 mmol), 1-(4-butoxyphenyl)-4-nitro-3-phenylbutan-1-one (1 eq, 2.10 g, 6.15 mmol) and ammonium acetate (35 eq, 16.6 g, 215 mmol) were dissolved in butanol (100 ml) and heated under reflux at a temperature of 120 °C for 12 h while stirring. After the reaction was cooled down to room temperature the solvent was removed in vacuum. The obtained solid was washed with water three times. Then the raw product was purified by column chromatography, eluting with CH<sub>2</sub>Cl<sub>2</sub>/n-hexane (1:1 v/v). The final product was recrystallized from hexane/tetrahydrofuran mixture and dried in the oven at 60 °C. For the calculation, the theoretical yield of the asymmetrical product is set as 100%. (352 mg, **32 %**)

<sup>1</sup>H NMR (300 MHz, DMSO-*d*6) δ: 8.09 (d, *J* = 7.3 Hz, 4H); 7.98 (d, *J* = 8.7 Hz, 4H); 7.59-7.35 (m, 8H); 7.18 (d, *J* = 8.8 Hz, 2H); 7.02 (d, *J* = 8.6 Hz, 2H); 4.11 (t, *J* = 6.4 Hz, 2H); 1.8-1.71 (m, 2H); 1.54-1.4 (m, 2H); 0.97 (t, *J* = 7.3 Hz, 3H)

4-(7-(4-butoxyphenyl)-5,5-difluoro-1,9-diphenyl-5H-4λ<sup>4</sup>,5λ<sup>4</sup>-dipyrrolo[1,2-*c*:2',1'-*f*][1,3,5,2]triazaborinin-3-yl)phenol **(6)**

Compound 6c (1eq, 200 mg, 0.37 mmol) was dissolved in dry CH<sub>2</sub>Cl<sub>2</sub> (20 ml) N,N-diisopropyletamine (DIPEA, 10 eq, 3.7 mmol 618 μl) was added and stirred at room temperature. Afterwards boron trifluoride diethyl etherate (15 eq, 5.6 mmol, 702 μl) was added under N<sub>2</sub>-atmosphere and the reaction solution was stirred overnight. The green-blue

solution was partitioned with water and dichloromethane in a separating funnel three times and dried over sodium sulfate. The crude solid was purified by column chromatography on silica gel in CH<sub>2</sub>Cl<sub>2</sub>. The product was obtained by gradually increasing the polarity to 2-4 % EtOH/ CH<sub>2</sub>Cl<sub>2</sub>. Further purification was achieved by crystallization from hexane/tetrahydrofuran to give the final product as a blue powder. (121 mg, **55.6 %**)

<sup>1</sup>H NMR (300 MHz, DMSO-*d*<sub>6</sub>) δ: 8.17-8.12 (m, 8H); 7.63 (s, 1H); 7.57-7.43 (m, 7H); 7.13 (d, *J* = 8.8 Hz, 2H); 6.95 (d, 8.7Hz, 2H); 4.11 (t, *J* = 6.4 Hz, 2H); 1.74 (m, 2H), 1.47 (m, 2H; 0.96 (t, *J* = 7.4 Hz, 3H)

MALDI-TOF *m/z* found 585.180 calculated 585.240

Synthesis of compound 7

*(Z)*-4-(5-((5-(4-butoxyphenyl)-3-phenyl-2H-pyrrol-2-ylidene)amino)-4-phenyl-1H-pyrrol-2-yl)benzoic acid (**7a**)

Compound **1b** (4.59 g, 14.67 mmol, 1eq) and 1-(4-butoxyphenyl)-4-nitro-3-phenylbutan-1-one (5.03 g, 14.67 mmol, 1 eq.) and ammonium acetate (41.6, 539 mmol, 35 eq.) were dissolved in butanol (100 ml) and stirred at 120 °C for 18 hours. The solvent of the blue mixture was removed by rotary evaporation and the residue was extracted with dichloromethane and H<sub>2</sub>O and the combined organic layers were concentrated under reduced pressure. The crude product was purified by column chromatography on silica-gel by eluting with 5 % THF/CH<sub>2</sub>Cl<sub>2</sub>. Finally the product was re-crystallized from hexane /tetrahydrofurane to obtain green-red shimmered crystals (1.083 g, **13 %**)

3-(4-butoxyphenyl)-7-(4-carboxyphenyl)-5,5-difluoro-1,9-diphenyl-5H-dipyrrolo[1,2-*c*:2',1'-*f*][1,3,5,2]triazaborinin-4-ium-5-uide (**7b**)

Compound 7a (1.083 g, 1.914 mmol, 1eq.) was dissolved in dry dichloromethane (350 ml) under inert atmosphere by using nitrogen. Then, boron trifluoride diethyletherate ( 3.6 ml, 29.18 mmol, 15 eq.) and DIPEA (3.188 ml, 19.16 mmol, 10 eq.) were added with a syringe and the reaction was stirred for 21 hours at room temperature. Then, the green solution was partitioned between dichloromethane and H<sub>2</sub>O in a separating funnel and the organic layer dried over sodium sulphate. The crude product was purified by column chromatography on silica-gel by eluting again with 5 % THF/CH<sub>2</sub>Cl<sub>2</sub>. Hexane and tetrahydrofurane was used for crystallization. (0.907 g, **77.2 %**)

<sup>1</sup>H NMR (300 MHz, DMSO-*d*<sub>6</sub>) δ:8.17-7.18 (m, 20H), 4.13 (t, *J* = 6.2 Hz, 2H), 1.79-1.69 (m, *J* = 6.6 Hz, 2H), 1.52-1.39 (m, *J* = 7.4 Hz, 2H), 0.95 (t, *J* = 7.4 Hz, 3H).

3-(4-butoxyphenyl)-7-(4-((4-(dimethylamino)benzyl)carbamoyl)phenyl)-5,5-difluoro-1,9-diphenyl-5H-dipyrrolo[1,2-*c*:2',1'-*f*][1,3,5,2]triazaborinin-4-ium-5-uide (**7**)



Compound **7 b** (102.6 mg, 0.167 mmol, 1 eq.), EDC (40 mg, 0.208 mmol, 1.2 eq), 1-hydroxybenzotriazole hydrate (30.5 mg, 0.225 mmol 1.2 eq.) and 4-(dimethylamino)benzylamine ( 29.3 mg, 0.225 mmol, 1 eq.) were dissolved in DMF. Then *N,N*-diisopropylethylamine ( 140  $\mu$ L, 0.841 mmol, 5 eq.) was added, the mixture was stirred at room temperature for 22 hours and the solvent was removed by rotary evaporation. The solvent was extracted with dichloromethane (100 ml) and H<sub>2</sub>O (100 ml), dried over sodium sulphate and purified via column chromatography on silica gel by eluting with 2 % THF/CH<sub>2</sub>Cl<sub>2</sub>. Hexane and tetrahydrofurane was used for crystallization. (0.097 g, **64.0 %**)

<sup>1</sup>H NMR (300 MHz, Chloroform-*d*<sub>6</sub>)  $\delta$ : 8.14-8.03 (m, *J* = 14.3 Hz, 8H), 7.87-7.84 (d, *J* = 8.4 Hz, 2H), 7.48-7.40 (m, *J* = 7.3 Hz, 6H), 7.24 (s, 2H), 7.01-6.98 (d, *J* = 8.7 Hz, 3H), 6.75-6.72 (d, *J* = 8.7 Hz, 2H), 6.31 (t, *J* = 4.5 Hz, 1H), 4.57-4.55 (d, *J* = 5.2 Hz, 2H), 4.05 (t, *J* = 6.4 Hz, 2H), 2.95 (s, 6H), 1.84-1.75 (m, *J* = 6.6 Hz, 2H), 1.54-1.47 (m, 2H), 0.99 (t, *J* = 7.4 Hz, 3H).

*3-(4-butoxyphenyl)-5,5-difluoro-7-(4-((4-hydroxybenzyl)carbamoyl)phenyl)-1,9-diphenyl-5H-dipyrrolo[1,2-c:2',1'-f][1,3,5,2]triazaborinin-4-ium-5-uide (8)*

Compound **7 b** (50 mg, 0.08 mmol, 1 eq.), EDC (18.7 mg, 0.09 mmol, 1.2 eq), 1-hydroxybenzotriazole hydrate (13.2 mg, 0.09 mmol 1.2 eq.) and 4-hydroxyphenethylamine ( 11.2 mg, 0.08 mmol, 1 eq.) were dissolved in DMF. Then *N,N*-diisopropylethylamine ( 70  $\mu$ L, 0.4 mmol, 5 eq.) was added, the mixture was stirred at room temperature over night. The solvent was extracted with dichloromethane (50 ml) and H<sub>2</sub>O (50 ml), dried over sodium sulphate and purified via column chromatography on silica gel by eluting with 4 % THF/CH<sub>2</sub>Cl<sub>2</sub>. Hexane and tetrahydrofurane was used for crystallization. (32.2 g, **54.0 %**)

<sup>1</sup>H NMR (300 MHz, Chloroform-*d*<sub>6</sub>)  $\delta$ : 8.14-8.03 (m, 8H), 7.78-7.75 (m,2H), 7.51-7.37 (m, 6H), 7.14-7.09 (m, 3H), 7.01-6.97 (m, 4H), 4.07-4.03 (t, 2H), 3.73-3.66 (m, 2H), 2.87 (t, 2H), 1.81-1.76 (m, 2H), 1.55-1.47 (m, 2H), 1.02-0.97 (t, *J* = 7.4 Hz, 3H)

## Compound 1

4-(7-(3,5-dichloro-4-hydroxyphenyl)-5,5-difluoro-1,9-diphenyl-5H-5 $\lambda^4$ ,6 $\lambda^4$ -dipyrrolo[1,2-c:2',1'-f][1,3,5,2]triazaborinin-3-yl)-N-dodecylbenzamide

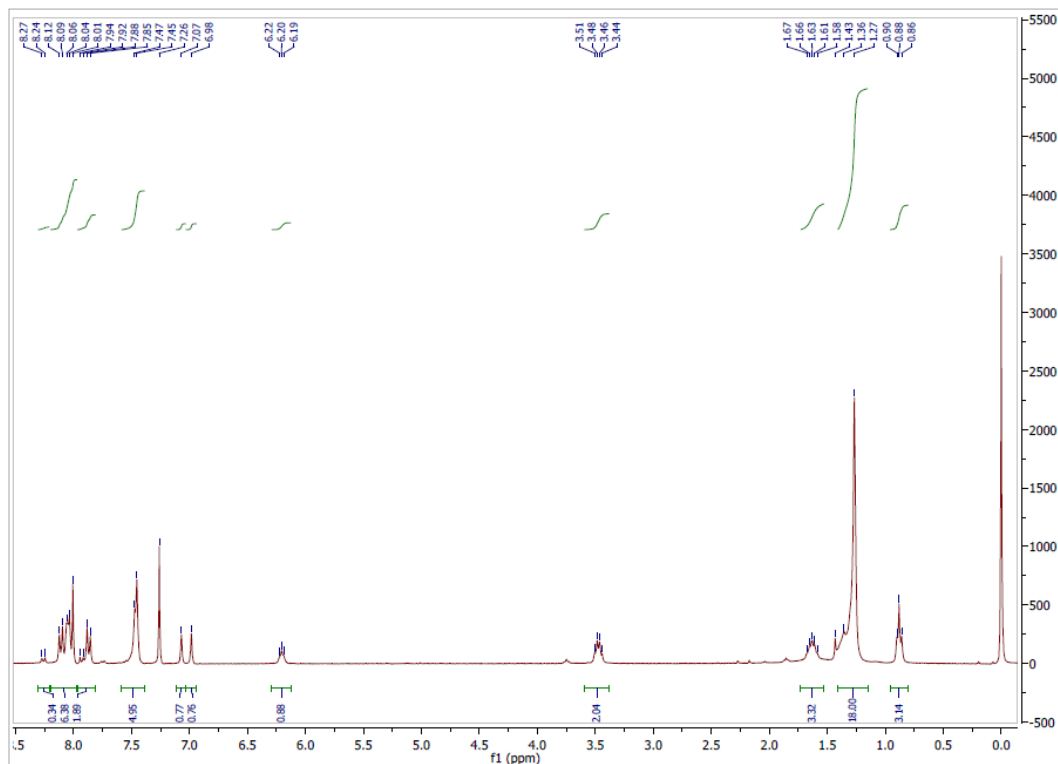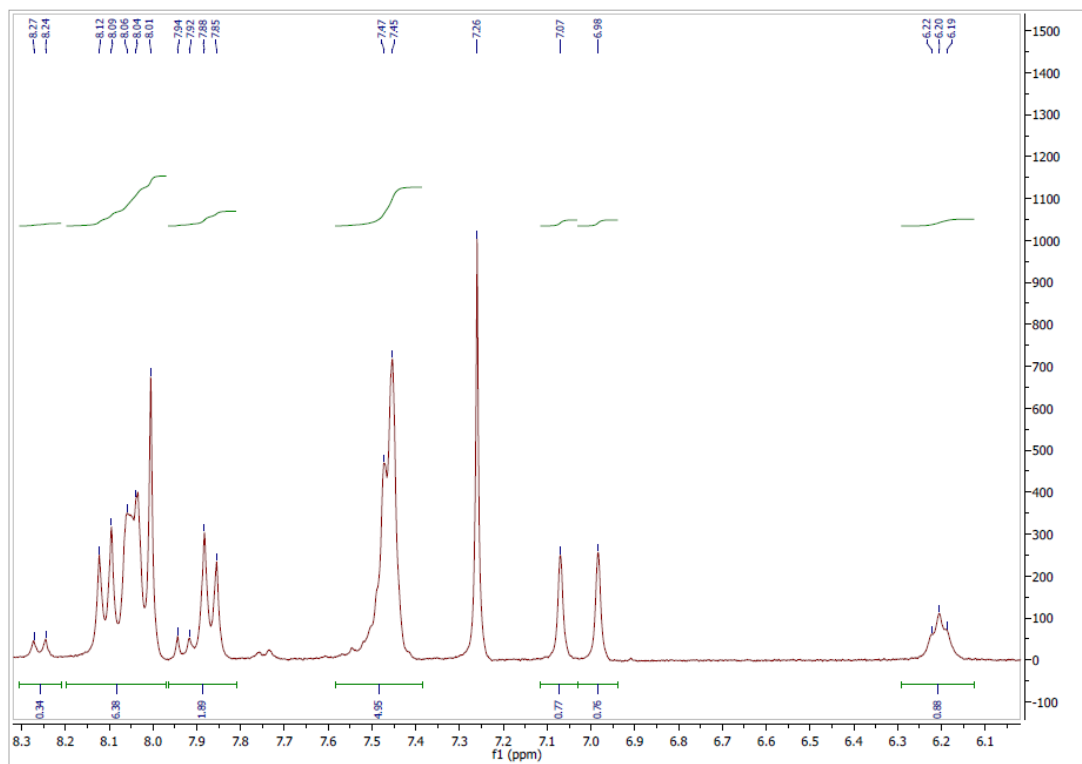

20140807\_Strobl\_Di ClOH C12\_Komplex 23 (0.383) Cn (Cen.3, 70.00, Ht); Sb (99.30.00); Cm (22:27)

TOF LD+  
422

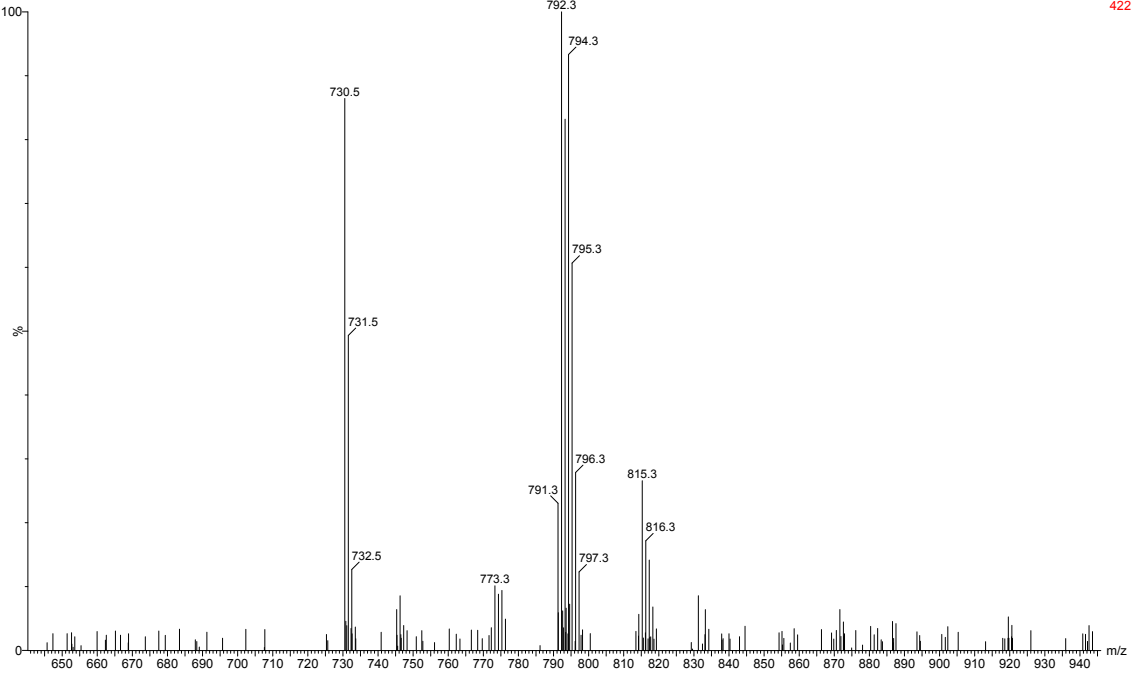

20140807\_Strobl\_Di ClOH C12\_Komplex (0.016) Is (0.10,0.01) C45H45BCl2F2N4O2

TOF LD+  
3.08e12

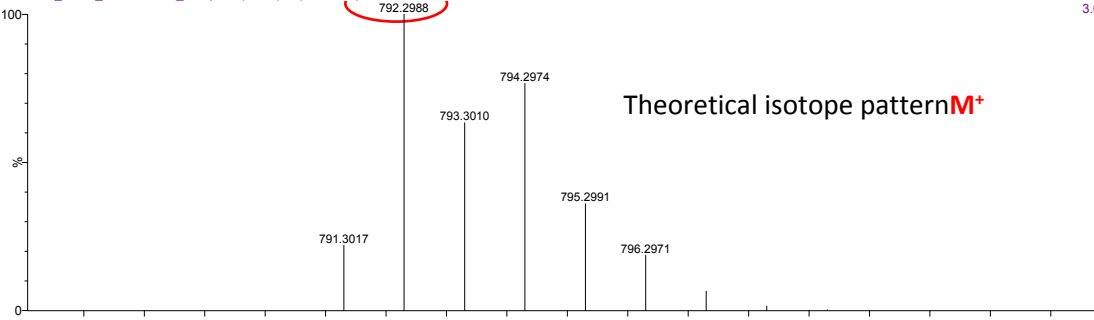

20140807\_Strobl\_Di ClOH C12\_Komplex 23 (0.383) Cn (Cen.3, 70.00, Ht); Sb (99.30.00); Cm (22:27)

TOF LD+  
422

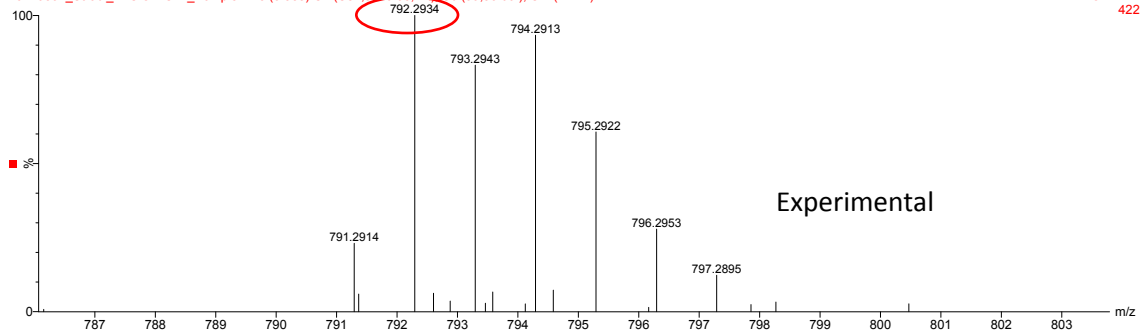

## Compound 2

4-(7-(4-butoxyphenyl)-5,5-difluoro-1,9-diphenyl-5H-4 $\lambda^4$ ,5 $\lambda^4$ -dipyrrolo[1,2-c:2',1'-f][1,3,5,2]triazaborinin-3-yl)-2,6-dichlorophenol (**2**)

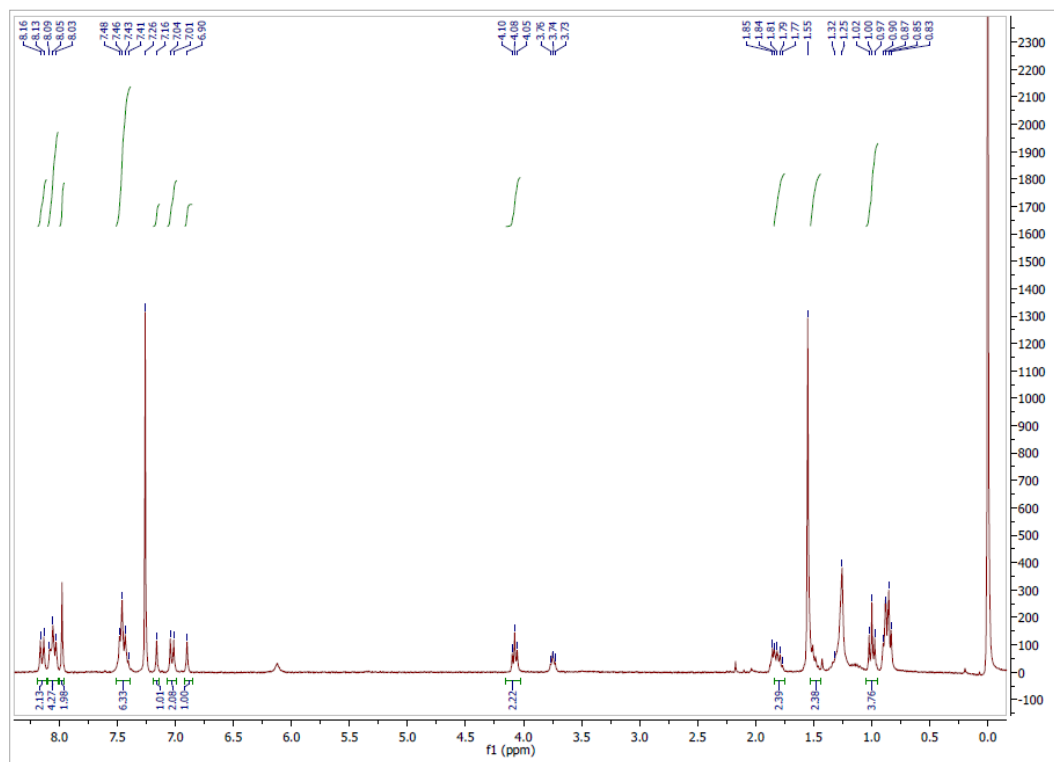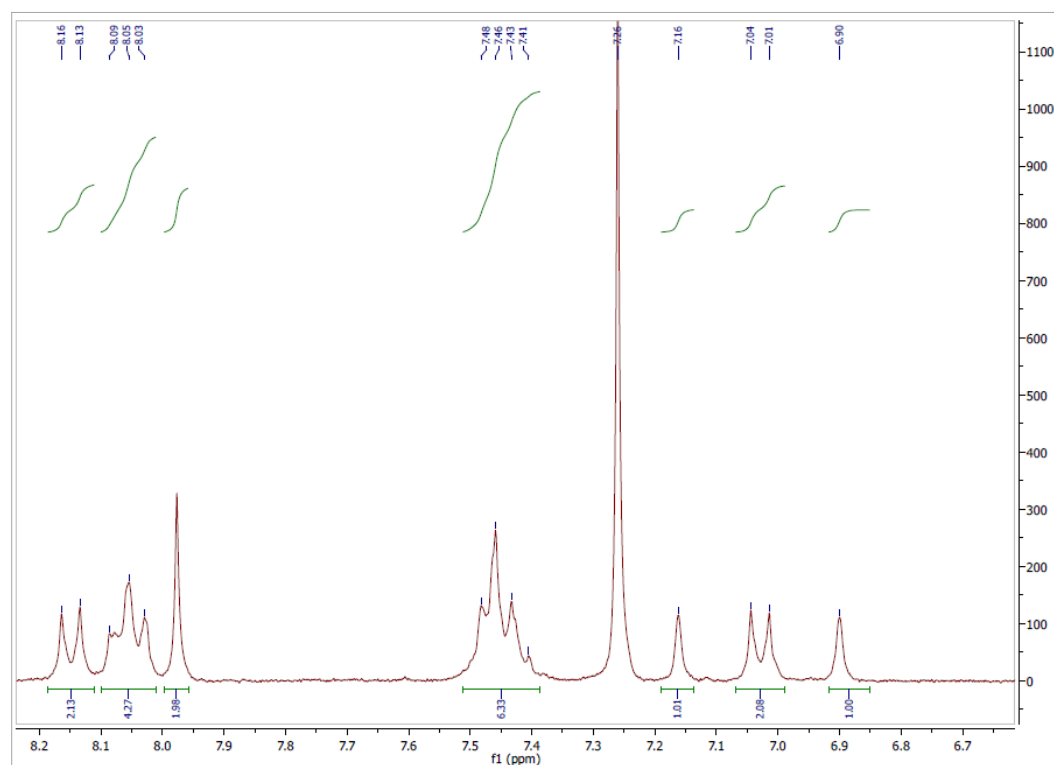

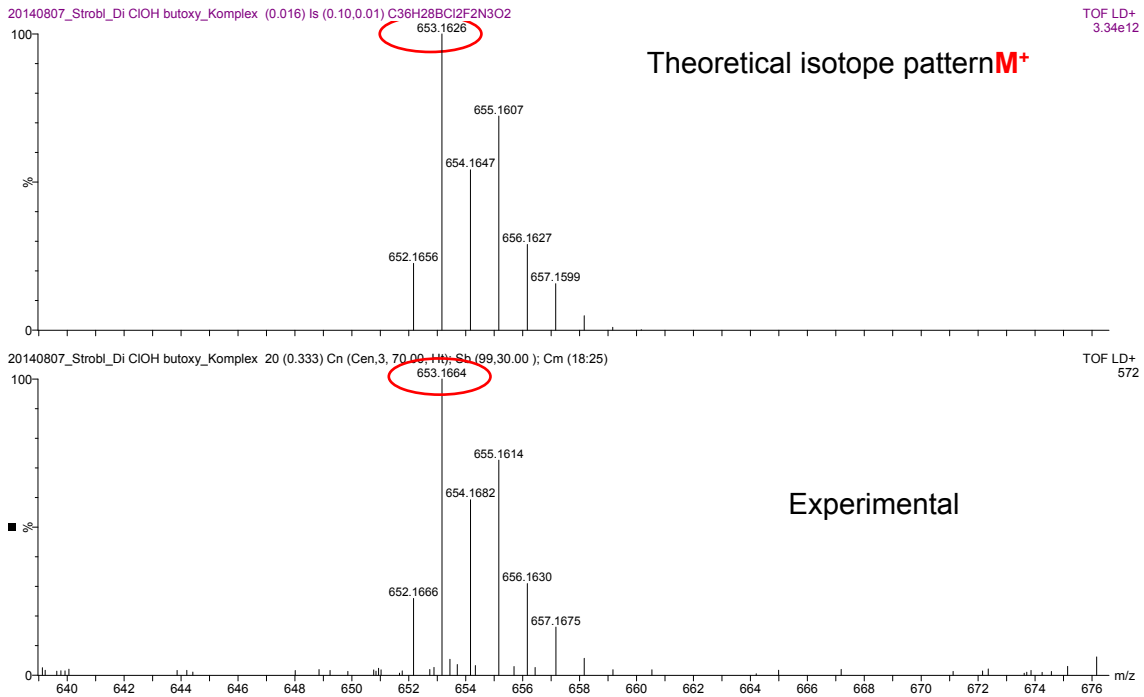

## Compound 3

*4-(7-(3-chloro-4-hydroxyphenyl)-5,5-difluoro-1,9-diphenyl-5H-5 $\lambda^4$ ,6 $\lambda^4$ -dipyrrolo[1,2-c:2',1'-f][1,3,5,2]triazaborinin-3-yl)-N-dodecylbenzamide (3)*

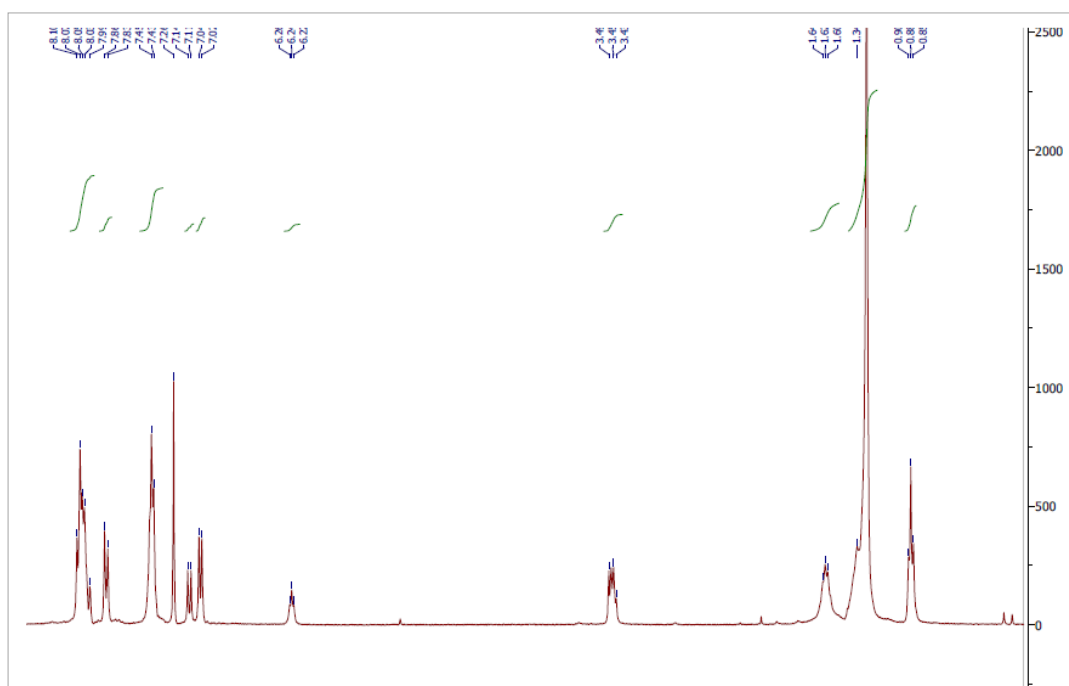

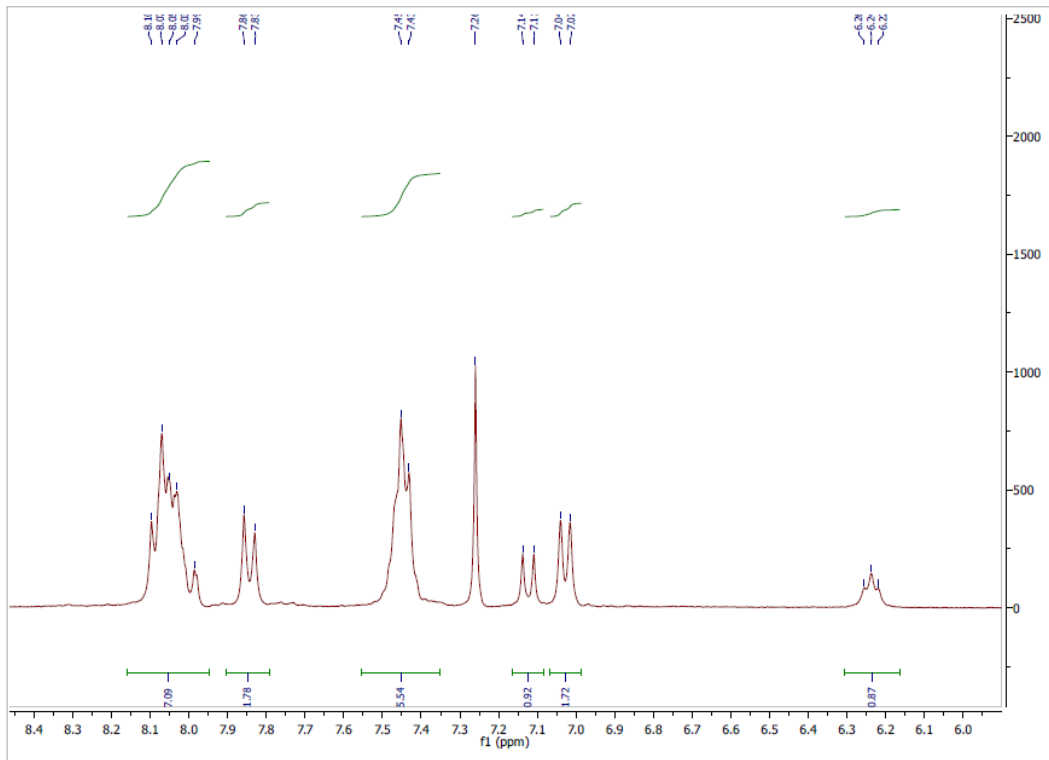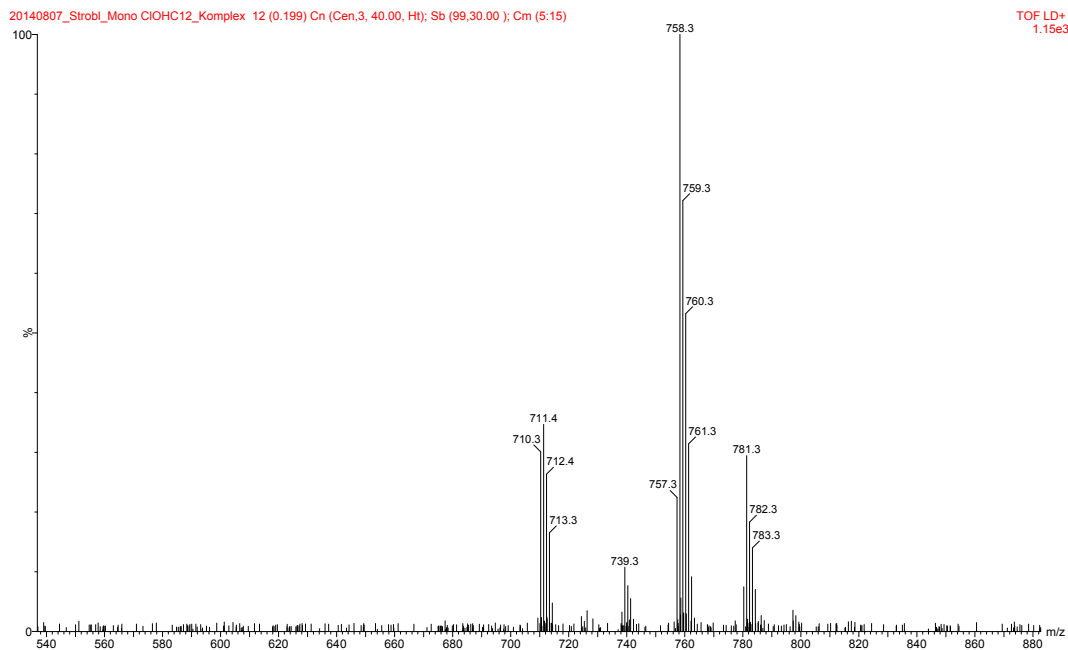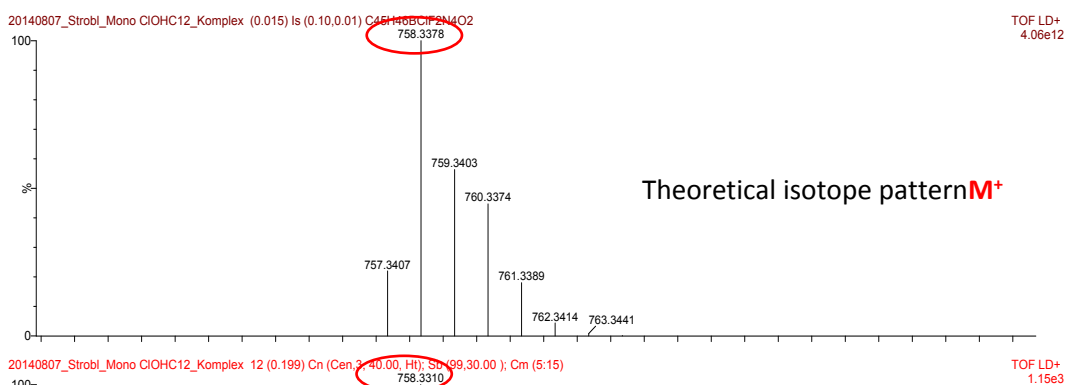

## Compound 4

4-(7-(4-butoxyphenyl)-5,5-difluoro-1,9-diphenyl-5H-4 $\lambda^4$ ,5 $\lambda^4$ -dipyrrolo[1,2-c:2',1'-f][1,3,5,2]triazaborinin-3-yl)-2-chlorophenol (**4**)

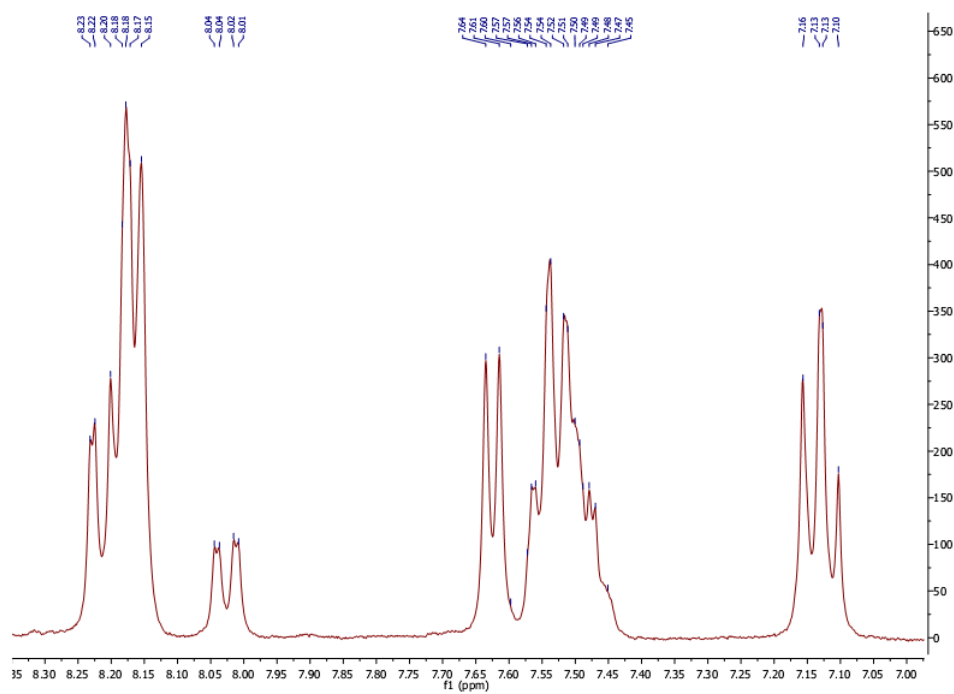

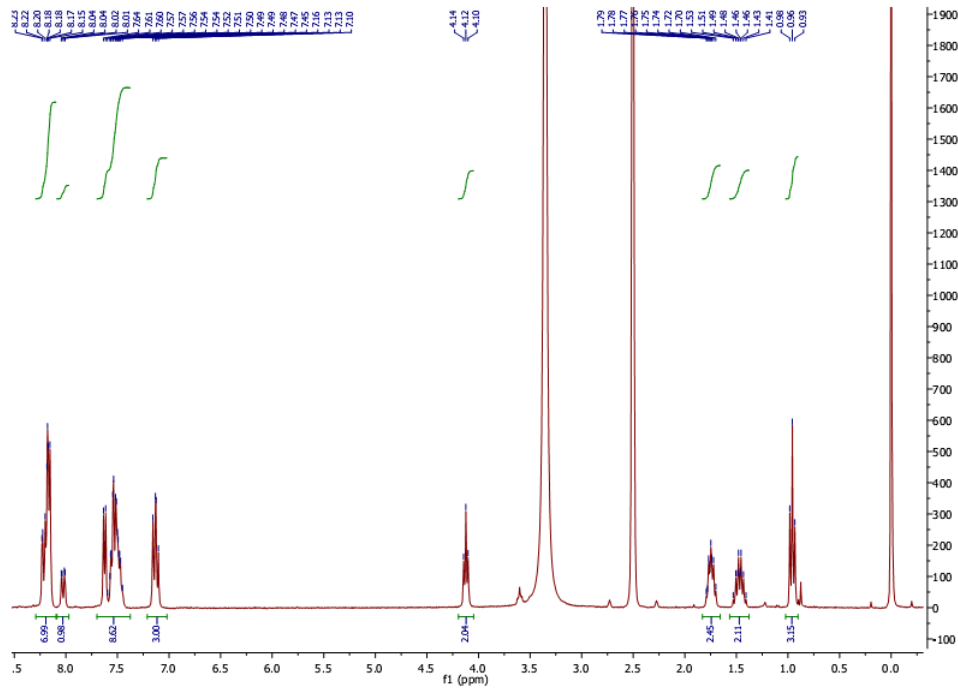

Stroh\_C1 OH Butoxy Komplex\_DCTB (0.016) Is (0.05:1.00) C38H28F2CIND02

TOF LD+  
4.41e2

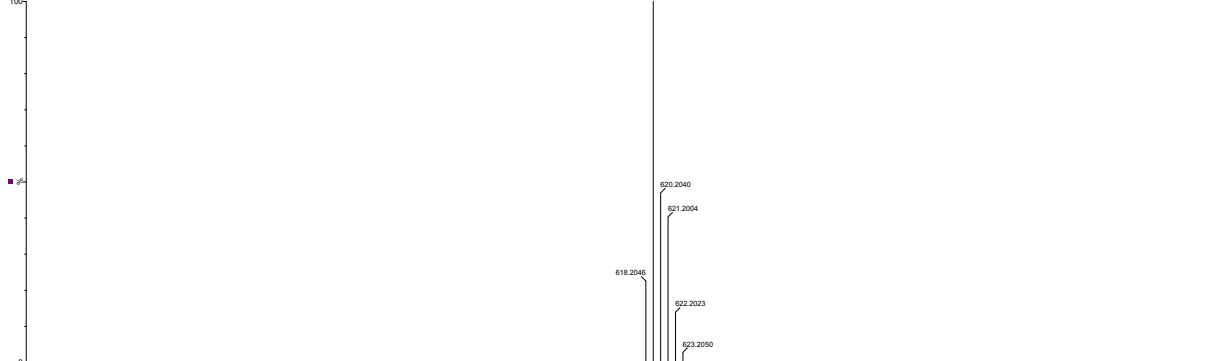

Stroh\_C1 OH Butoxy Komplex\_DCTB 28 (0.467) Cr (Cen.3, 70.00, Ht), Sb (99.10.00), Cm (12.15+28.35)

TOF LD+  
2.94e3

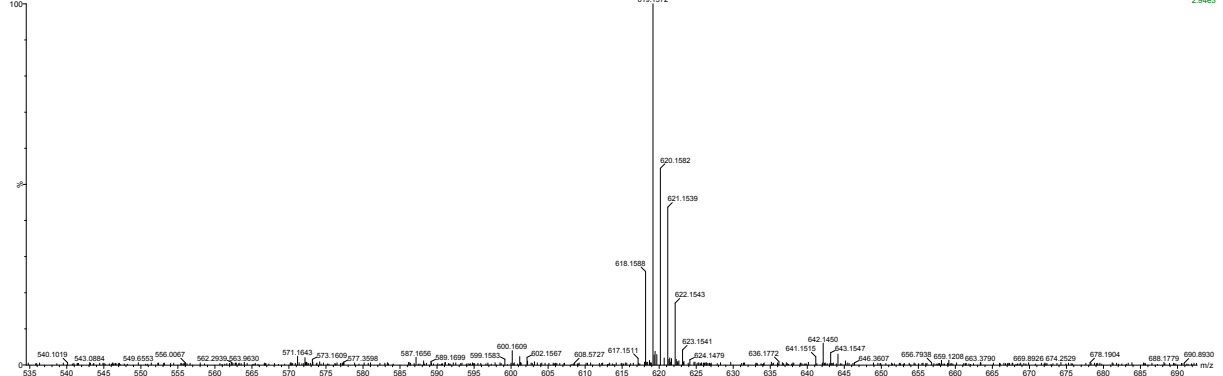



**Compound 5**

*4-(5,5-difluoro-7-(4-hydroxyphenyl)-1,9-diphenyl-5H-5λ<sup>4</sup>,6λ<sup>4</sup>-dipyrrolo[1,2-c:2',1'-f][1,3,5,2]triazaborinin-3-yl)-N-dodecylbenzamide (5)*

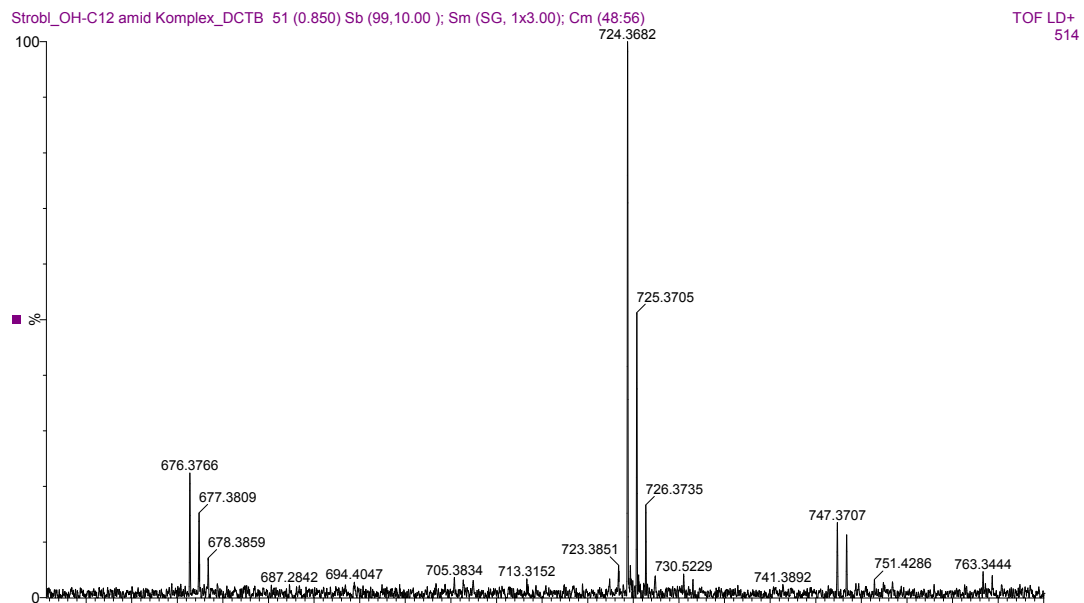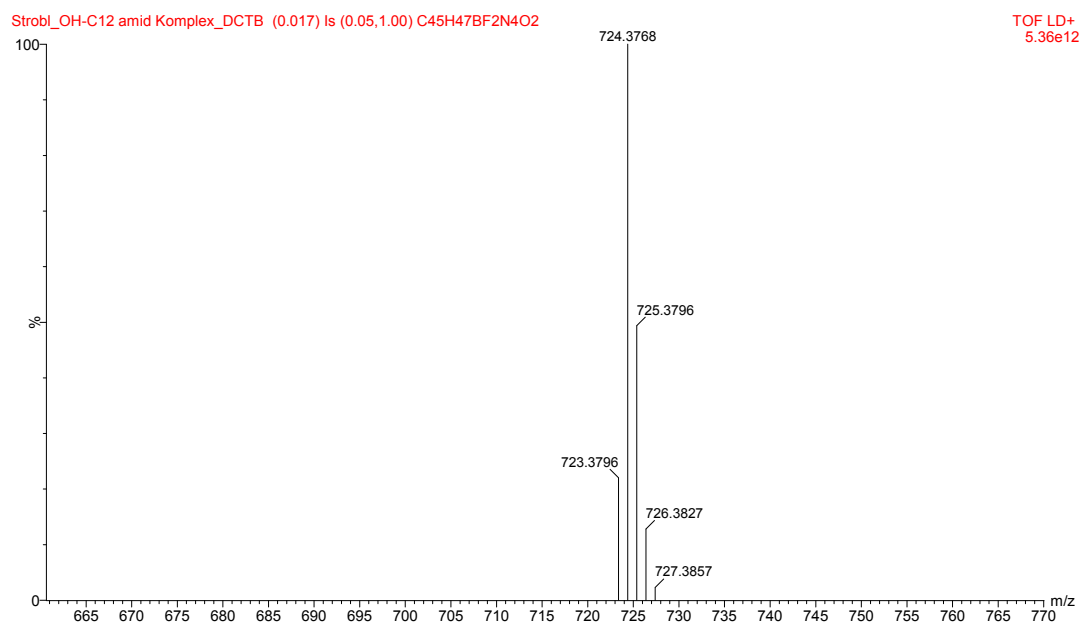

## Compound 6

*4-(7-(4-butoxyphenyl)-5,5-difluoro-1,9-diphenyl-5H-4λ<sup>4</sup>,5λ<sup>4</sup>-dipyrrolo[1,2-c:2',1'-f][1,3,5,2]triazaborinin-3-yl)phenol (6)*

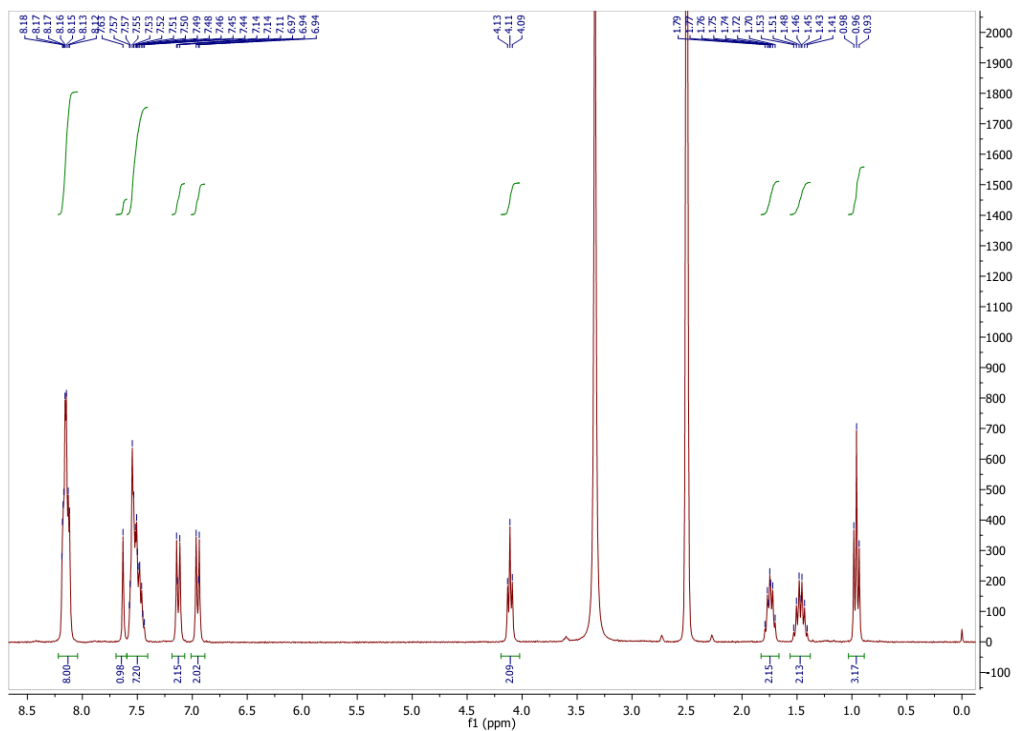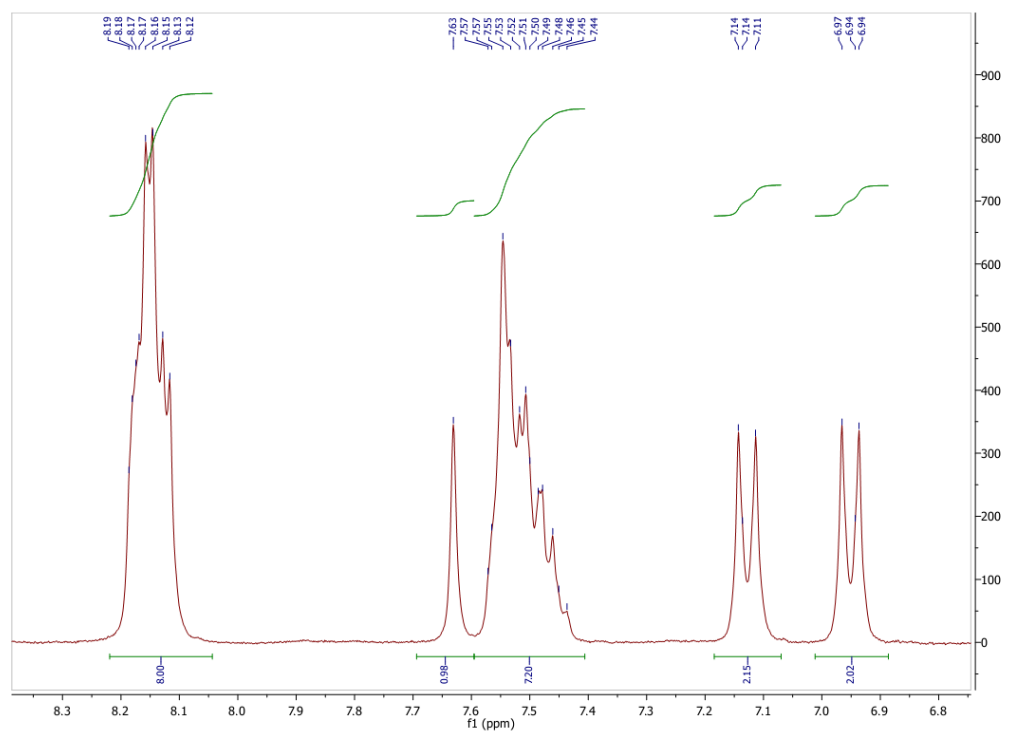

Strobl\_OH Butoxy Komplex\_DCTB (0.017) Is (0.05,1.00) C36H30BF2N3O2

TOF LD+  
5.82e12

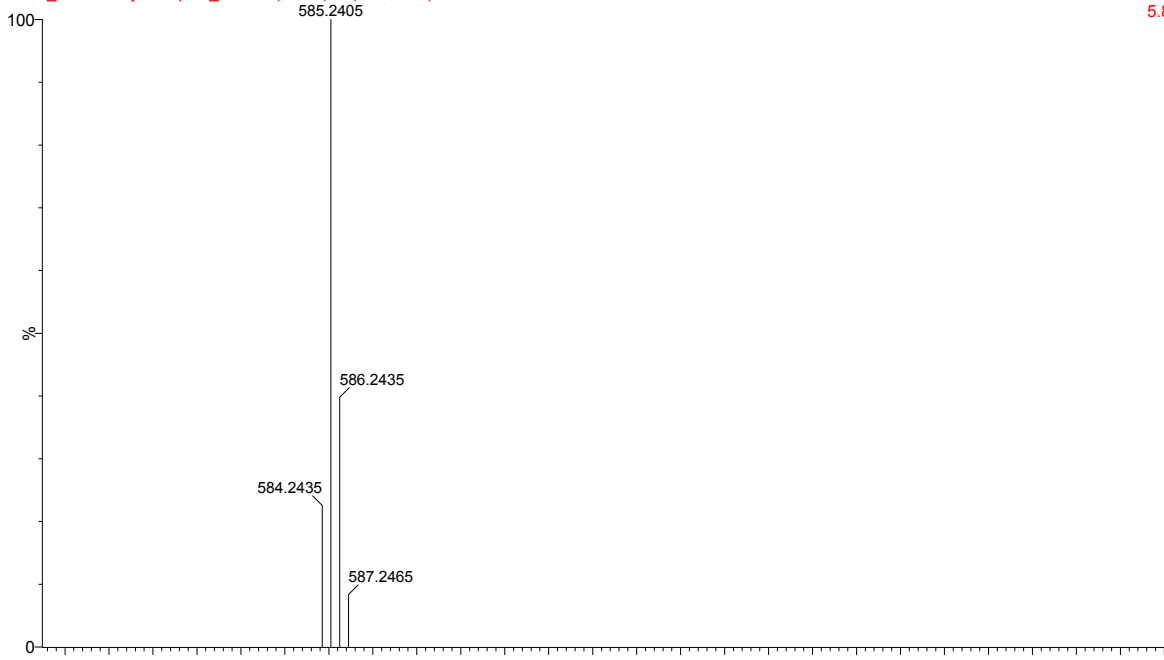

Strobl\_OH Butoxy Komplex\_DCTB 9 (0.150) Sb (99,10.00 ); Sm (SG, 1x3.00); Cm ((8:11+21:26+37:38+48:49))

TOF LD+  
2.59e3

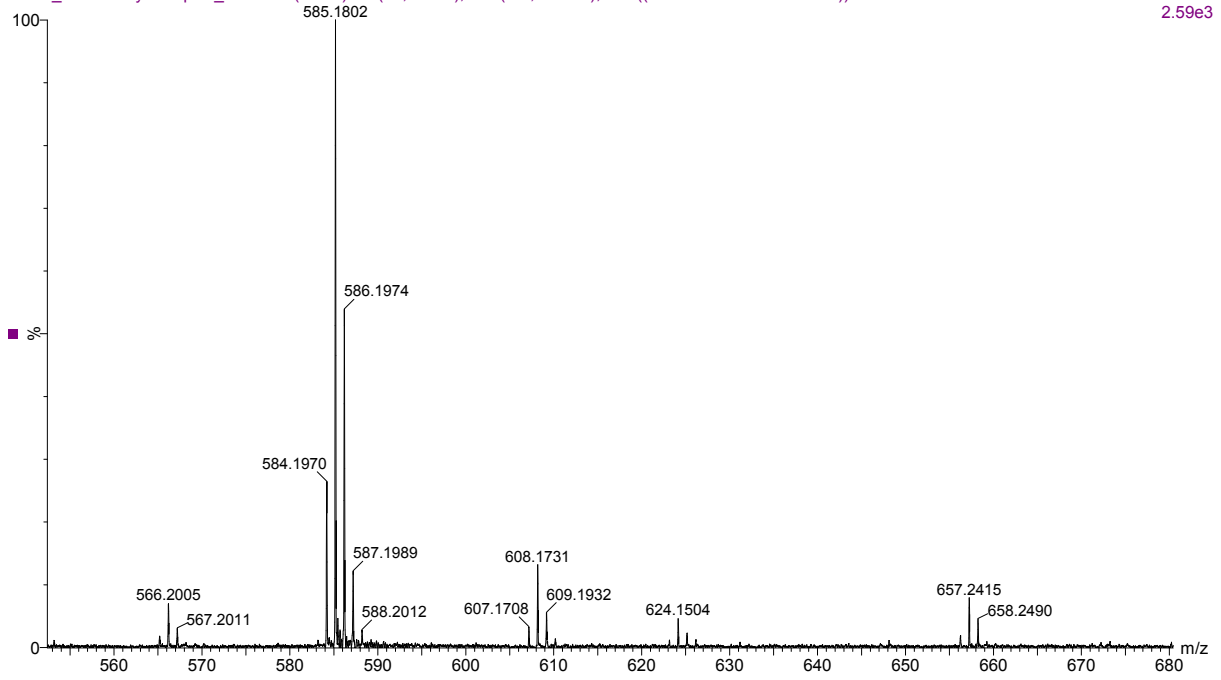

## Compound 7

3-(4-butoxyphenyl)-7-(4-((4-(dimethylamino)benzyl)carbamoyl)phenyl)-5,5-difluoro-1,9-diphenyl-5H-dipyrrolo[1,2-c:2',1'-f][1,3,5,2]triazaborinin-4-ium-5-uide (**7**)

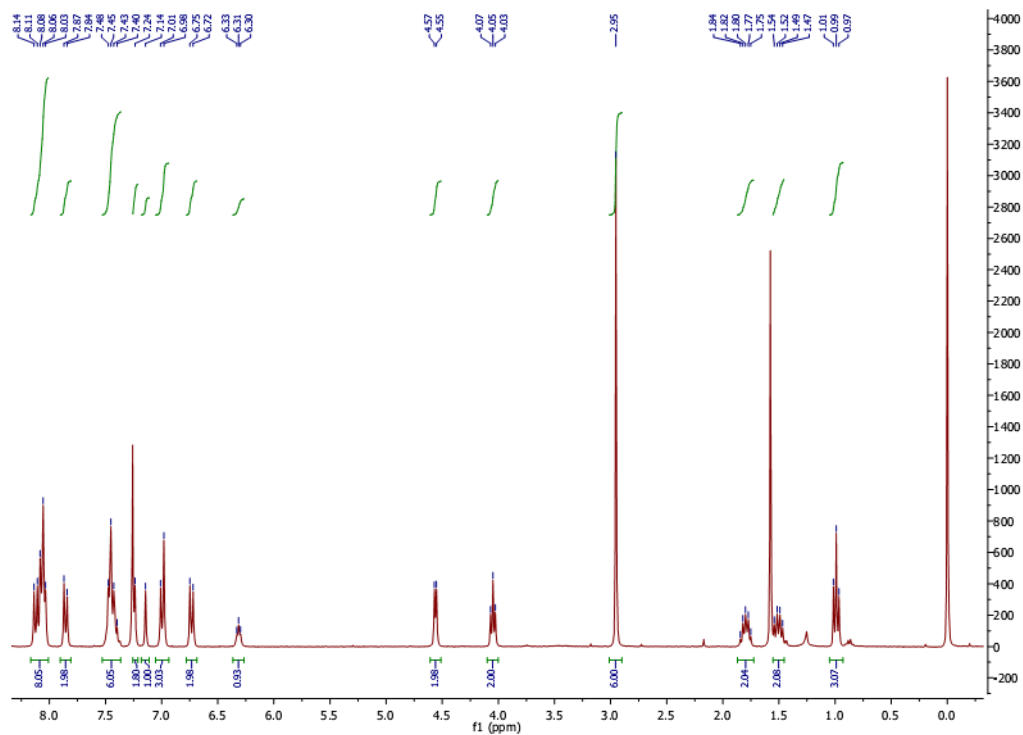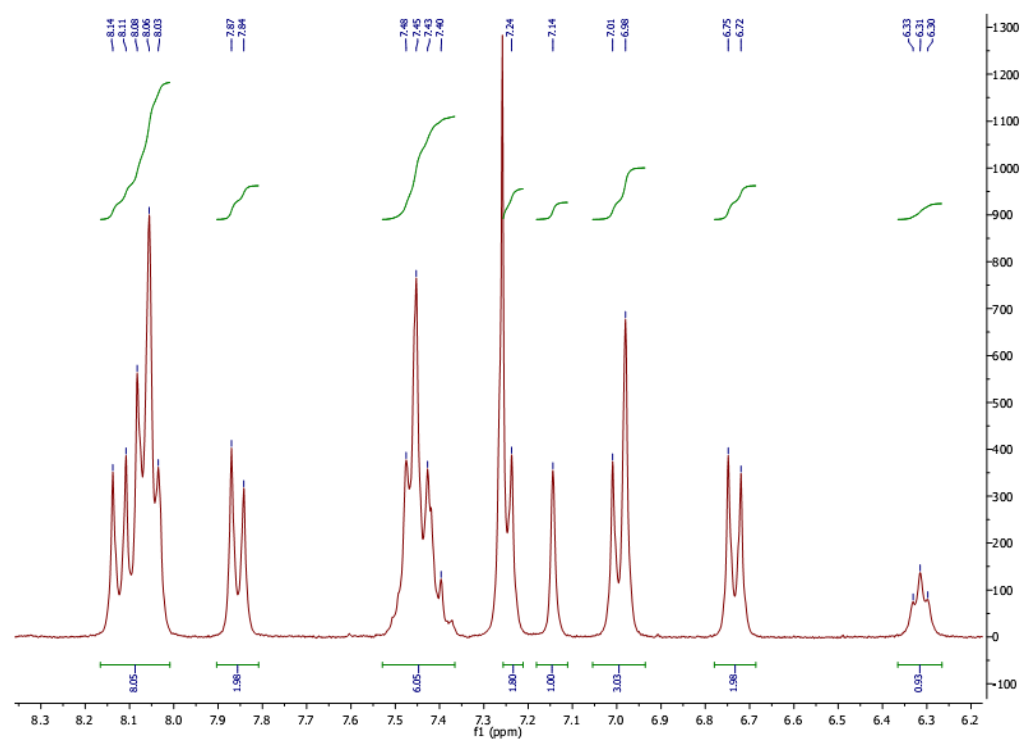

- [1] G. A. Crosby, J. N. Demas, *J. Phys. Chem.* **1971**, 75, 991–1024.
- [2] T. Jokic, S. M. Borisov, R. Saf, D. A. Nielsen, M. Kühl, I. Klimant, *Anal. Chem.* **2012**, 84, 6723–6730.
- [3] S. Schutting, T. Jokic, M. Strobl, S. M. Borisov, D. de Beer, I. Klimant, *J Mater Chem C* **2015**, 3, 5474–5483.
